# Supplementary material
Source: MDPI journal article supplement (https://www.mdpi.com/2306-5338/9/12/217)
Supplement: s1 [file s1]

Table S1. The description of hydraulic/hydrologic parameters for each data chip number of catchment

|    | Data chip number | Area of the catchment, ha | Conduits gradient, ‰ | Catchments gradient% | Length of conduits, m | Area of the tank zbiornika | Flow reduction coefficient $\beta$ |
|----|------------------|---------------------------|----------------------|----------------------|-----------------------|----------------------------|------------------------------------|
| WA | 1                | 0.28                      | 2                    | 0.5                  | 100                   | 0                          | 0.35                               |
| WA | 2                | 0.42                      | 2                    | 0.4                  | 100                   | 0                          | 0.35                               |
| WA | 3                | 0.14                      | 2                    | 0.3                  | 100                   | 0                          | 0.35                               |
| WA | 4                | 0.28                      | 2                    | 0.4                  | 150                   | 0                          | 0.35                               |
| WA | 5                | 0.14                      | 2                    | 0.5                  | 150                   | 0                          | 0.35                               |
| WA | 6                | 0.42                      | 2                    | 0.3                  | 150                   | 0                          | 0.35                               |
| WA | 7                | 0.42                      | 2                    | 0.5                  | 200                   | 0                          | 0.35                               |
| WA | 8                | 0.14                      | 2                    | 0.4                  | 200                   | 0                          | 0.35                               |
| WA | 9                | 0.28                      | 2                    | 0.3                  | 200                   | 0                          | 0.35                               |
| WA | 10               | 0.28                      | 3                    | 0.4                  | 100                   | 0                          | 0.35                               |
| WA | 11               | 0.42                      | 3                    | 0.3                  | 100                   | 0                          | 0.35                               |
| WA | 12               | 0.14                      | 3                    | 0.5                  | 100                   | 0                          | 0.35                               |
| WA | 13               | 0.28                      | 3                    | 0.3                  | 150                   | 0                          | 0.35                               |
| WA | 14               | 0.42                      | 3                    | 0.5                  | 150                   | 0                          | 0.35                               |
| WA | 15               | 0.14                      | 3                    | 0.4                  | 150                   | 0                          | 0.35                               |
| WA | 16               | 0.42                      | 3                    | 0.4                  | 200                   | 0                          | 0.35                               |
| WA | 17               | 0.28                      | 3                    | 0.5                  | 200                   | 0                          | 0.35                               |
| WA | 18               | 0.14                      | 3                    | 0.3                  | 200                   | 0                          | 0.35                               |
| WA | 19               | 0.28                      | 4                    | 0.3                  | 100                   | 0                          | 0.35                               |
| WA | 20               | 0.14                      | 4                    | 0.4                  | 100                   | 0                          | 0.35                               |
| WA | 21               | 0.42                      | 4                    | 0.5                  | 100                   | 0                          | 0.35                               |
| WA | 22               | 0.14                      | 4                    | 0.3                  | 150                   | 0                          | 0.35                               |
| WA | 23               | 0.28                      | 4                    | 0.5                  | 150                   | 0                          | 0.35                               |
| WA | 24               | 0.42                      | 4                    | 0.4                  | 150                   | 0                          | 0.35                               |
| WA | 25               | 0.14                      | 4                    | 0.5                  | 200                   | 0                          | 0.35                               |
| WA | 26               | 0.28                      | 4                    | 0.4                  | 200                   | 0                          | 0.35                               |
| WA | 27               | 0.42                      | 4                    | 0.3                  | 200                   | 0                          | 0.35                               |
| WA | 28               | 0.28                      | 2                    | 0.5                  | 100                   | 0                          | 0.5                                |
| WA | 29               | 0.42                      | 2                    | 0.4                  | 100                   | 0                          | 0.5                                |
| WA | 30               | 0.14                      | 2                    | 0.3                  | 100                   | 0                          | 0.5                                |
| WA | 31               | 0.28                      | 2                    | 0.4                  | 150                   | 0                          | 0.5                                |
| WA | 32               | 0.14                      | 2                    | 0.5                  | 150                   | 0                          | 0.5                                |
| WA | 33               | 0.42                      | 2                    | 0.3                  | 150                   | 0                          | 0.5                                |
| WA | 34               | 0.42                      | 2                    | 0.5                  | 200                   | 0                          | 0.5                                |
| WA | 35               | 0.14                      | 2                    | 0.4                  | 200                   | 0                          | 0.5                                |
| WA | 36               | 0.28                      | 2                    | 0.3                  | 200                   | 0                          | 0.5                                |
| WA | 37               | 0.28                      | 3                    | 0.4                  | 100                   | 0                          | 0.5                                |
| WA | 38               | 0.42                      | 3                    | 0.3                  | 100                   | 0                          | 0.5                                |
| WA | 39               | 0.14                      | 3                    | 0.5                  | 100                   | 0                          | 0.5                                |
| WA | 40               | 0.28                      | 3                    | 0.3                  | 150                   | 0                          | 0.5                                |

|    |    |      |   |     |     |   |      |
|----|----|------|---|-----|-----|---|------|
| WA | 41 | 0.42 | 3 | 0.5 | 150 | 0 | 0.5  |
| WA | 42 | 0.14 | 3 | 0.4 | 150 | 0 | 0.5  |
| WA | 43 | 0.42 | 3 | 0.4 | 200 | 0 | 0.5  |
| WA | 44 | 0.28 | 3 | 0.5 | 200 | 0 | 0.5  |
| WA | 45 | 0.14 | 3 | 0.3 | 200 | 0 | 0.5  |
| WA | 46 | 0.28 | 4 | 0.3 | 100 | 0 | 0.5  |
| WA | 47 | 0.14 | 4 | 0.4 | 100 | 0 | 0.5  |
| WA | 48 | 0.42 | 4 | 0.5 | 100 | 0 | 0.5  |
| WA | 49 | 0.14 | 4 | 0.3 | 150 | 0 | 0.5  |
| WA | 50 | 0.28 | 4 | 0.5 | 150 | 0 | 0.5  |
| WA | 51 | 0.42 | 4 | 0.4 | 150 | 0 | 0.5  |
| WA | 52 | 0.14 | 4 | 0.5 | 200 | 0 | 0.5  |
| WA | 53 | 0.28 | 4 | 0.4 | 200 | 0 | 0.5  |
| WA | 54 | 0.42 | 4 | 0.3 | 200 | 0 | 0.5  |
| WA | 55 | 0.28 | 2 | 0.5 | 100 | 0 | 0.65 |
| WA | 56 | 0.42 | 2 | 0.4 | 100 | 0 | 0.65 |
| WA | 57 | 0.14 | 2 | 0.3 | 100 | 0 | 0.65 |
| WA | 58 | 0.28 | 2 | 0.4 | 150 | 0 | 0.65 |
| WA | 59 | 0.14 | 2 | 0.5 | 150 | 0 | 0.65 |
| WA | 60 | 0.42 | 2 | 0.3 | 150 | 0 | 0.65 |
| WA | 61 | 0.42 | 2 | 0.5 | 200 | 0 | 0.65 |
| WA | 62 | 0.14 | 2 | 0.4 | 200 | 0 | 0.65 |
| WA | 63 | 0.28 | 2 | 0.3 | 200 | 0 | 0.65 |
| WA | 64 | 0.28 | 3 | 0.4 | 100 | 0 | 0.65 |
| WA | 65 | 0.42 | 3 | 0.3 | 100 | 0 | 0.65 |
| WA | 66 | 0.14 | 3 | 0.5 | 100 | 0 | 0.65 |
| WA | 67 | 0.28 | 3 | 0.3 | 150 | 0 | 0.65 |
| WA | 68 | 0.42 | 3 | 0.5 | 150 | 0 | 0.65 |
| WA | 69 | 0.14 | 3 | 0.4 | 150 | 0 | 0.65 |
| WA | 70 | 0.42 | 3 | 0.4 | 200 | 0 | 0.65 |
| WA | 71 | 0.28 | 3 | 0.5 | 200 | 0 | 0.65 |
| WA | 72 | 0.14 | 3 | 0.3 | 200 | 0 | 0.65 |
| WA | 73 | 0.28 | 4 | 0.3 | 100 | 0 | 0.65 |
| WA | 74 | 0.14 | 4 | 0.4 | 100 | 0 | 0.65 |
| WA | 75 | 0.42 | 4 | 0.5 | 100 | 0 | 0.65 |
| WA | 76 | 0.14 | 4 | 0.3 | 150 | 0 | 0.65 |
| WA | 77 | 0.28 | 4 | 0.5 | 150 | 0 | 0.65 |
| WA | 78 | 0.42 | 4 | 0.4 | 150 | 0 | 0.65 |
| WA | 79 | 0.14 | 4 | 0.5 | 200 | 0 | 0.65 |
| WA | 80 | 0.28 | 4 | 0.4 | 200 | 0 | 0.65 |
| WA | 81 | 0.42 | 4 | 0.3 | 200 | 0 | 0.65 |
| WA | 82 | 0.28 | 2 | 0.5 | 100 | 1 | 0.35 |
| WA | 83 | 0.42 | 2 | 0.4 | 100 | 1 | 0.35 |
| WA | 84 | 0.14 | 2 | 0.3 | 100 | 1 | 0.35 |
| WA | 85 | 0.28 | 2 | 0.4 | 150 | 1 | 0.35 |
| WA | 86 | 0.14 | 2 | 0.5 | 150 | 1 | 0.35 |
| WA | 87 | 0.42 | 2 | 0.3 | 150 | 1 | 0.35 |
| WA | 88 | 0.42 | 2 | 0.5 | 200 | 1 | 0.35 |
| WA | 89 | 0.14 | 2 | 0.4 | 200 | 1 | 0.35 |
| WA | 90 | 0.28 | 2 | 0.3 | 200 | 1 | 0.35 |

|    |     |      |   |     |     |   |      |
|----|-----|------|---|-----|-----|---|------|
| WA | 91  | 0.28 | 3 | 0.4 | 100 | 1 | 0.35 |
| WA | 92  | 0.42 | 3 | 0.3 | 100 | 1 | 0.35 |
| WA | 93  | 0.14 | 3 | 0.5 | 100 | 1 | 0.35 |
| WA | 94  | 0.28 | 3 | 0.3 | 150 | 1 | 0.35 |
| WA | 95  | 0.42 | 3 | 0.5 | 150 | 1 | 0.35 |
| WA | 96  | 0.14 | 3 | 0.4 | 150 | 1 | 0.35 |
| WA | 97  | 0.42 | 3 | 0.4 | 200 | 1 | 0.35 |
| WA | 98  | 0.28 | 3 | 0.5 | 200 | 1 | 0.35 |
| WA | 99  | 0.14 | 3 | 0.3 | 200 | 1 | 0.35 |
| WA | 100 | 0.28 | 4 | 0.3 | 100 | 1 | 0.35 |
| WA | 101 | 0.14 | 4 | 0.4 | 100 | 1 | 0.35 |
| WA | 102 | 0.42 | 4 | 0.5 | 100 | 1 | 0.35 |
| WA | 103 | 0.14 | 4 | 0.3 | 150 | 1 | 0.35 |
| WA | 104 | 0.28 | 4 | 0.5 | 150 | 1 | 0.35 |
| WA | 105 | 0.42 | 4 | 0.4 | 150 | 1 | 0.35 |
| WA | 106 | 0.14 | 4 | 0.5 | 200 | 1 | 0.35 |
| WA | 107 | 0.28 | 4 | 0.4 | 200 | 1 | 0.35 |
| WA | 108 | 0.42 | 4 | 0.3 | 200 | 1 | 0.35 |
| WA | 109 | 0.28 | 2 | 0.5 | 100 | 1 | 0.5  |
| WA | 110 | 0.42 | 2 | 0.4 | 100 | 1 | 0.5  |
| WA | 111 | 0.14 | 2 | 0.3 | 100 | 1 | 0.5  |
| WA | 112 | 0.28 | 2 | 0.4 | 150 | 1 | 0.5  |
| WA | 113 | 0.14 | 2 | 0.5 | 150 | 1 | 0.5  |
| WA | 114 | 0.42 | 2 | 0.3 | 150 | 1 | 0.5  |
| WA | 115 | 0.42 | 2 | 0.5 | 200 | 1 | 0.5  |
| WA | 116 | 0.14 | 2 | 0.4 | 200 | 1 | 0.5  |
| WA | 117 | 0.28 | 2 | 0.3 | 200 | 1 | 0.5  |
| WA | 118 | 0.28 | 3 | 0.4 | 100 | 1 | 0.5  |
| WA | 119 | 0.42 | 3 | 0.3 | 100 | 1 | 0.5  |
| WA | 120 | 0.14 | 3 | 0.5 | 100 | 1 | 0.5  |
| WA | 121 | 0.28 | 3 | 0.3 | 150 | 1 | 0.5  |
| WA | 122 | 0.42 | 3 | 0.5 | 150 | 1 | 0.5  |
| WA | 123 | 0.14 | 3 | 0.4 | 150 | 1 | 0.5  |
| WA | 124 | 0.42 | 3 | 0.4 | 200 | 1 | 0.5  |
| WA | 125 | 0.28 | 3 | 0.5 | 200 | 1 | 0.5  |
| WA | 126 | 0.14 | 3 | 0.3 | 200 | 1 | 0.5  |
| WA | 127 | 0.28 | 4 | 0.3 | 100 | 1 | 0.5  |
| WA | 128 | 0.14 | 4 | 0.4 | 100 | 1 | 0.5  |
| WA | 129 | 0.42 | 4 | 0.5 | 100 | 1 | 0.5  |
| WA | 130 | 0.14 | 4 | 0.3 | 150 | 1 | 0.5  |
| WA | 131 | 0.28 | 4 | 0.5 | 150 | 1 | 0.5  |
| WA | 132 | 0.42 | 4 | 0.4 | 150 | 1 | 0.5  |
| WA | 133 | 0.14 | 4 | 0.5 | 200 | 1 | 0.5  |
| WA | 134 | 0.28 | 4 | 0.4 | 200 | 1 | 0.5  |
| WA | 135 | 0.42 | 4 | 0.3 | 200 | 1 | 0.5  |
| WA | 136 | 0.28 | 2 | 0.5 | 100 | 1 | 0.65 |
| WA | 137 | 0.42 | 2 | 0.4 | 100 | 1 | 0.65 |
| WA | 138 | 0.14 | 2 | 0.3 | 100 | 1 | 0.65 |
| WA | 139 | 0.28 | 2 | 0.4 | 150 | 1 | 0.65 |
| WA | 140 | 0.14 | 2 | 0.5 | 150 | 1 | 0.65 |

|    |     |      |   |     |     |   |      |
|----|-----|------|---|-----|-----|---|------|
| WA | 141 | 0.42 | 2 | 0.3 | 150 | 1 | 0.65 |
| WA | 142 | 0.42 | 2 | 0.5 | 200 | 1 | 0.65 |
| WA | 143 | 0.14 | 2 | 0.4 | 200 | 1 | 0.65 |
| WA | 144 | 0.28 | 2 | 0.3 | 200 | 1 | 0.65 |
| WA | 145 | 0.28 | 3 | 0.4 | 100 | 1 | 0.65 |
| WA | 146 | 0.42 | 3 | 0.3 | 100 | 1 | 0.65 |
| WA | 147 | 0.14 | 3 | 0.5 | 100 | 1 | 0.65 |
| WA | 148 | 0.28 | 3 | 0.3 | 150 | 1 | 0.65 |
| WA | 149 | 0.42 | 3 | 0.5 | 150 | 1 | 0.65 |
| WA | 150 | 0.14 | 3 | 0.4 | 150 | 1 | 0.65 |
| WA | 151 | 0.42 | 3 | 0.4 | 200 | 1 | 0.65 |
| WA | 152 | 0.28 | 3 | 0.5 | 200 | 1 | 0.65 |
| WA | 153 | 0.14 | 3 | 0.3 | 200 | 1 | 0.65 |
| WA | 154 | 0.28 | 4 | 0.3 | 100 | 1 | 0.65 |
| WA | 155 | 0.14 | 4 | 0.4 | 100 | 1 | 0.65 |
| WA | 156 | 0.42 | 4 | 0.5 | 100 | 1 | 0.65 |
| WA | 157 | 0.14 | 4 | 0.3 | 150 | 1 | 0.65 |
| WA | 158 | 0.28 | 4 | 0.5 | 150 | 1 | 0.65 |
| WA | 159 | 0.42 | 4 | 0.4 | 150 | 1 | 0.65 |
| WA | 160 | 0.14 | 4 | 0.5 | 200 | 1 | 0.65 |
| WA | 161 | 0.28 | 4 | 0.4 | 200 | 1 | 0.65 |
| WA | 162 | 0.42 | 4 | 0.3 | 200 | 1 | 0.65 |
| WA | 163 | 0.28 | 2 | 0.5 | 100 | 2 | 0.35 |
| WA | 164 | 0.42 | 2 | 0.4 | 100 | 2 | 0.35 |
| WA | 165 | 0.14 | 2 | 0.3 | 100 | 2 | 0.35 |
| WA | 166 | 0.28 | 2 | 0.4 | 150 | 2 | 0.35 |
| WA | 167 | 0.14 | 2 | 0.5 | 150 | 2 | 0.35 |
| WA | 168 | 0.42 | 2 | 0.3 | 150 | 2 | 0.35 |
| WA | 169 | 0.42 | 2 | 0.5 | 200 | 2 | 0.35 |
| WA | 170 | 0.14 | 2 | 0.4 | 200 | 2 | 0.35 |
| WA | 171 | 0.28 | 2 | 0.3 | 200 | 2 | 0.35 |
| WA | 172 | 0.28 | 3 | 0.4 | 100 | 2 | 0.35 |
| WA | 173 | 0.42 | 3 | 0.3 | 100 | 2 | 0.35 |
| WA | 174 | 0.14 | 3 | 0.5 | 100 | 2 | 0.35 |
| WA | 175 | 0.28 | 3 | 0.3 | 150 | 2 | 0.35 |
| WA | 176 | 0.42 | 3 | 0.5 | 150 | 2 | 0.35 |
| WA | 177 | 0.14 | 3 | 0.4 | 150 | 2 | 0.35 |
| WA | 178 | 0.42 | 3 | 0.4 | 200 | 2 | 0.35 |
| WA | 179 | 0.28 | 3 | 0.5 | 200 | 2 | 0.35 |
| WA | 180 | 0.14 | 3 | 0.3 | 200 | 2 | 0.35 |
| WA | 181 | 0.28 | 4 | 0.3 | 100 | 2 | 0.35 |
| WA | 182 | 0.14 | 4 | 0.4 | 100 | 2 | 0.35 |
| WA | 183 | 0.42 | 4 | 0.5 | 100 | 2 | 0.35 |
| WA | 184 | 0.14 | 4 | 0.3 | 150 | 2 | 0.35 |
| WA | 185 | 0.28 | 4 | 0.5 | 150 | 2 | 0.35 |
| WA | 186 | 0.42 | 4 | 0.4 | 150 | 2 | 0.35 |
| WA | 187 | 0.14 | 4 | 0.5 | 200 | 2 | 0.35 |
| WA | 188 | 0.28 | 4 | 0.4 | 200 | 2 | 0.35 |
| WA | 189 | 0.42 | 4 | 0.3 | 200 | 2 | 0.35 |
| WA | 190 | 0.28 | 2 | 0.5 | 100 | 2 | 0.5  |

|    |     |      |   |     |     |   |      |
|----|-----|------|---|-----|-----|---|------|
| WA | 191 | 0.42 | 2 | 0.4 | 100 | 2 | 0.5  |
| WA | 192 | 0.14 | 2 | 0.3 | 100 | 2 | 0.5  |
| WA | 193 | 0.28 | 2 | 0.4 | 150 | 2 | 0.5  |
| WA | 194 | 0.14 | 2 | 0.5 | 150 | 2 | 0.5  |
| WA | 195 | 0.42 | 2 | 0.3 | 150 | 2 | 0.5  |
| WA | 196 | 0.42 | 2 | 0.5 | 200 | 2 | 0.5  |
| WA | 197 | 0.14 | 2 | 0.4 | 200 | 2 | 0.5  |
| WA | 198 | 0.28 | 2 | 0.3 | 200 | 2 | 0.5  |
| WA | 199 | 0.28 | 3 | 0.4 | 100 | 2 | 0.5  |
| WA | 200 | 0.42 | 3 | 0.3 | 100 | 2 | 0.5  |
| WA | 201 | 0.14 | 3 | 0.5 | 100 | 2 | 0.5  |
| WA | 202 | 0.28 | 3 | 0.3 | 150 | 2 | 0.5  |
| WA | 203 | 0.42 | 3 | 0.5 | 150 | 2 | 0.5  |
| WA | 204 | 0.14 | 3 | 0.4 | 150 | 2 | 0.5  |
| WA | 205 | 0.42 | 3 | 0.4 | 200 | 2 | 0.5  |
| WA | 206 | 0.28 | 3 | 0.5 | 200 | 2 | 0.5  |
| WA | 207 | 0.14 | 3 | 0.3 | 200 | 2 | 0.5  |
| WA | 208 | 0.28 | 4 | 0.3 | 100 | 2 | 0.5  |
| WA | 209 | 0.14 | 4 | 0.4 | 100 | 2 | 0.5  |
| WA | 210 | 0.42 | 4 | 0.5 | 100 | 2 | 0.5  |
| WA | 211 | 0.14 | 4 | 0.3 | 150 | 2 | 0.5  |
| WA | 212 | 0.28 | 4 | 0.5 | 150 | 2 | 0.5  |
| WA | 213 | 0.42 | 4 | 0.4 | 150 | 2 | 0.5  |
| WA | 214 | 0.14 | 4 | 0.5 | 200 | 2 | 0.5  |
| WA | 215 | 0.28 | 4 | 0.4 | 200 | 2 | 0.5  |
| WA | 216 | 0.42 | 4 | 0.3 | 200 | 2 | 0.5  |
| WA | 217 | 0.28 | 2 | 0.5 | 100 | 2 | 0.65 |
| WA | 218 | 0.42 | 2 | 0.4 | 100 | 2 | 0.65 |
| WA | 219 | 0.14 | 2 | 0.3 | 100 | 2 | 0.65 |
| WA | 220 | 0.28 | 2 | 0.4 | 150 | 2 | 0.65 |
| WA | 221 | 0.14 | 2 | 0.5 | 150 | 2 | 0.65 |
| WA | 222 | 0.42 | 2 | 0.3 | 150 | 2 | 0.65 |
| WA | 223 | 0.42 | 2 | 0.5 | 200 | 2 | 0.65 |
| WA | 224 | 0.14 | 2 | 0.4 | 200 | 2 | 0.65 |
| WA | 225 | 0.28 | 2 | 0.3 | 200 | 2 | 0.65 |
| WA | 226 | 0.28 | 3 | 0.4 | 100 | 2 | 0.65 |
| WA | 227 | 0.42 | 3 | 0.3 | 100 | 2 | 0.65 |
| WA | 228 | 0.14 | 3 | 0.5 | 100 | 2 | 0.65 |
| WA | 229 | 0.28 | 3 | 0.3 | 150 | 2 | 0.65 |
| WA | 230 | 0.42 | 3 | 0.5 | 150 | 2 | 0.65 |
| WA | 231 | 0.14 | 3 | 0.4 | 150 | 2 | 0.65 |
| WA | 232 | 0.42 | 3 | 0.4 | 200 | 2 | 0.65 |
| WA | 233 | 0.28 | 3 | 0.5 | 200 | 2 | 0.65 |
| WA | 234 | 0.14 | 3 | 0.3 | 200 | 2 | 0.65 |
| WA | 235 | 0.28 | 4 | 0.3 | 100 | 2 | 0.65 |
| WA | 236 | 0.14 | 4 | 0.4 | 100 | 2 | 0.65 |
| WA | 237 | 0.42 | 4 | 0.5 | 100 | 2 | 0.65 |
| WA | 238 | 0.14 | 4 | 0.3 | 150 | 2 | 0.65 |
| WA | 239 | 0.28 | 4 | 0.5 | 150 | 2 | 0.65 |
| WA | 240 | 0.42 | 4 | 0.4 | 150 | 2 | 0.65 |

|    |     |      |   |     |     |   |      |
|----|-----|------|---|-----|-----|---|------|
| WA | 241 | 0.14 | 4 | 0.5 | 200 | 2 | 0.65 |
| WA | 242 | 0.28 | 4 | 0.4 | 200 | 2 | 0.65 |
| WA | 243 | 0.42 | 4 | 0.3 | 200 | 2 | 0.65 |
| WA | 244 | 0.28 | 2 | 0.5 | 100 | 3 | 0.35 |
| WA | 245 | 0.42 | 2 | 0.4 | 100 | 3 | 0.35 |
| WA | 246 | 0.14 | 2 | 0.3 | 100 | 3 | 0.35 |
| WA | 247 | 0.28 | 2 | 0.4 | 150 | 3 | 0.35 |
| WA | 248 | 0.14 | 2 | 0.5 | 150 | 3 | 0.35 |
| WA | 249 | 0.42 | 2 | 0.3 | 150 | 3 | 0.35 |
| WA | 250 | 0.42 | 2 | 0.5 | 200 | 3 | 0.35 |
| WA | 251 | 0.14 | 2 | 0.4 | 200 | 3 | 0.35 |
| WA | 252 | 0.28 | 2 | 0.3 | 200 | 3 | 0.35 |
| WA | 253 | 0.28 | 3 | 0.4 | 100 | 3 | 0.35 |
| WA | 254 | 0.42 | 3 | 0.3 | 100 | 3 | 0.35 |
| WA | 255 | 0.14 | 3 | 0.5 | 100 | 3 | 0.35 |
| WA | 256 | 0.28 | 3 | 0.3 | 150 | 3 | 0.35 |
| WA | 257 | 0.42 | 3 | 0.5 | 150 | 3 | 0.35 |
| WA | 258 | 0.14 | 3 | 0.4 | 150 | 3 | 0.35 |
| WA | 259 | 0.42 | 3 | 0.4 | 200 | 3 | 0.35 |
| WA | 260 | 0.28 | 3 | 0.5 | 200 | 3 | 0.35 |
| WA | 261 | 0.14 | 3 | 0.3 | 200 | 3 | 0.35 |
| WA | 262 | 0.28 | 4 | 0.3 | 100 | 3 | 0.35 |
| WA | 263 | 0.14 | 4 | 0.4 | 100 | 3 | 0.35 |
| WA | 264 | 0.42 | 4 | 0.5 | 100 | 3 | 0.35 |
| WA | 265 | 0.14 | 4 | 0.3 | 150 | 3 | 0.35 |
| WA | 266 | 0.28 | 4 | 0.5 | 150 | 3 | 0.35 |
| WA | 267 | 0.42 | 4 | 0.4 | 150 | 3 | 0.35 |
| WA | 268 | 0.14 | 4 | 0.5 | 200 | 3 | 0.35 |
| WA | 269 | 0.28 | 4 | 0.4 | 200 | 3 | 0.35 |
| WA | 270 | 0.42 | 4 | 0.3 | 200 | 3 | 0.35 |
| WA | 271 | 0.28 | 2 | 0.5 | 100 | 3 | 0.5  |
| WA | 272 | 0.42 | 2 | 0.4 | 100 | 3 | 0.5  |
| WA | 273 | 0.14 | 2 | 0.3 | 100 | 3 | 0.5  |
| WA | 274 | 0.28 | 2 | 0.4 | 150 | 3 | 0.5  |
| WA | 275 | 0.14 | 2 | 0.5 | 150 | 3 | 0.5  |
| WA | 276 | 0.42 | 2 | 0.3 | 150 | 3 | 0.5  |
| WA | 277 | 0.42 | 2 | 0.5 | 200 | 3 | 0.5  |
| WA | 278 | 0.14 | 2 | 0.4 | 200 | 3 | 0.5  |
| WA | 279 | 0.28 | 2 | 0.3 | 200 | 3 | 0.5  |
| WA | 280 | 0.28 | 3 | 0.4 | 100 | 3 | 0.5  |
| WA | 281 | 0.42 | 3 | 0.3 | 100 | 3 | 0.5  |
| WA | 282 | 0.14 | 3 | 0.5 | 100 | 3 | 0.5  |
| WA | 283 | 0.28 | 3 | 0.3 | 150 | 3 | 0.5  |
| WA | 284 | 0.42 | 3 | 0.5 | 150 | 3 | 0.5  |
| WA | 285 | 0.14 | 3 | 0.4 | 150 | 3 | 0.5  |
| WA | 286 | 0.42 | 3 | 0.4 | 200 | 3 | 0.5  |
| WA | 287 | 0.28 | 3 | 0.5 | 200 | 3 | 0.5  |
| WA | 288 | 0.14 | 3 | 0.3 | 200 | 3 | 0.5  |
| WA | 289 | 0.28 | 4 | 0.3 | 100 | 3 | 0.5  |
| WA | 290 | 0.14 | 4 | 0.4 | 100 | 3 | 0.5  |

|    |     |      |   |     |     |   |      |
|----|-----|------|---|-----|-----|---|------|
| WA | 291 | 0.42 | 4 | 0.5 | 100 | 3 | 0.5  |
| WA | 292 | 0.14 | 4 | 0.3 | 150 | 3 | 0.5  |
| WA | 293 | 0.28 | 4 | 0.5 | 150 | 3 | 0.5  |
| WA | 294 | 0.42 | 4 | 0.4 | 150 | 3 | 0.5  |
| WA | 295 | 0.14 | 4 | 0.5 | 200 | 3 | 0.5  |
| WA | 296 | 0.28 | 4 | 0.4 | 200 | 3 | 0.5  |
| WA | 297 | 0.42 | 4 | 0.3 | 200 | 3 | 0.5  |
| WA | 298 | 0.28 | 2 | 0.5 | 100 | 3 | 0.65 |
| WA | 299 | 0.42 | 2 | 0.4 | 100 | 3 | 0.65 |
| WA | 300 | 0.14 | 2 | 0.3 | 100 | 3 | 0.65 |
| WA | 301 | 0.28 | 2 | 0.4 | 150 | 3 | 0.65 |
| WA | 302 | 0.14 | 2 | 0.5 | 150 | 3 | 0.65 |
| WA | 303 | 0.42 | 2 | 0.3 | 150 | 3 | 0.65 |
| WA | 304 | 0.42 | 2 | 0.5 | 200 | 3 | 0.65 |
| WA | 305 | 0.14 | 2 | 0.4 | 200 | 3 | 0.65 |
| WA | 306 | 0.28 | 2 | 0.3 | 200 | 3 | 0.65 |
| WA | 307 | 0.28 | 3 | 0.4 | 100 | 3 | 0.65 |
| WA | 308 | 0.42 | 3 | 0.3 | 100 | 3 | 0.65 |
| WA | 309 | 0.14 | 3 | 0.5 | 100 | 3 | 0.65 |
| WA | 310 | 0.28 | 3 | 0.3 | 150 | 3 | 0.65 |
| WA | 311 | 0.42 | 3 | 0.5 | 150 | 3 | 0.65 |
| WA | 312 | 0.14 | 3 | 0.4 | 150 | 3 | 0.65 |
| WA | 313 | 0.42 | 3 | 0.4 | 200 | 3 | 0.65 |
| WA | 314 | 0.28 | 3 | 0.5 | 200 | 3 | 0.65 |
| WA | 315 | 0.14 | 3 | 0.3 | 200 | 3 | 0.65 |
| WA | 316 | 0.28 | 4 | 0.3 | 100 | 3 | 0.65 |
| WA | 317 | 0.14 | 4 | 0.4 | 100 | 3 | 0.65 |
| WA | 318 | 0.42 | 4 | 0.5 | 100 | 3 | 0.65 |
| WA | 319 | 0.14 | 4 | 0.3 | 150 | 3 | 0.65 |
| WA | 320 | 0.28 | 4 | 0.5 | 150 | 3 | 0.65 |
| WA | 321 | 0.42 | 4 | 0.4 | 150 | 3 | 0.65 |
| WA | 322 | 0.14 | 4 | 0.5 | 200 | 3 | 0.65 |
| WA | 323 | 0.28 | 4 | 0.4 | 200 | 3 | 0.65 |
| WA | 324 | 0.42 | 4 | 0.3 | 200 | 3 | 0.65 |
| WA | 325 | 0.28 | 2 | 0.5 | 100 | 4 | 0.35 |
| WA | 326 | 0.42 | 2 | 0.4 | 100 | 4 | 0.35 |
| WA | 327 | 0.14 | 2 | 0.3 | 100 | 4 | 0.35 |
| WA | 328 | 0.28 | 2 | 0.4 | 150 | 4 | 0.35 |
| WA | 329 | 0.14 | 2 | 0.5 | 150 | 4 | 0.35 |
| WA | 330 | 0.42 | 2 | 0.3 | 150 | 4 | 0.35 |
| WA | 331 | 0.42 | 2 | 0.5 | 200 | 4 | 0.35 |
| WA | 332 | 0.14 | 2 | 0.4 | 200 | 4 | 0.35 |
| WA | 333 | 0.28 | 2 | 0.3 | 200 | 4 | 0.35 |
| WA | 334 | 0.28 | 3 | 0.4 | 100 | 4 | 0.35 |
| WA | 335 | 0.42 | 3 | 0.3 | 100 | 4 | 0.35 |
| WA | 336 | 0.14 | 3 | 0.5 | 100 | 4 | 0.35 |
| WA | 337 | 0.28 | 3 | 0.3 | 150 | 4 | 0.35 |
| WA | 338 | 0.42 | 3 | 0.5 | 150 | 4 | 0.35 |
| WA | 339 | 0.14 | 3 | 0.4 | 150 | 4 | 0.35 |
| WA | 340 | 0.42 | 3 | 0.4 | 200 | 4 | 0.35 |

|    |     |      |   |     |     |   |      |
|----|-----|------|---|-----|-----|---|------|
| WA | 341 | 0.28 | 3 | 0.5 | 200 | 4 | 0.35 |
| WA | 342 | 0.14 | 3 | 0.3 | 200 | 4 | 0.35 |
| WA | 343 | 0.28 | 4 | 0.3 | 100 | 4 | 0.35 |
| WA | 344 | 0.14 | 4 | 0.4 | 100 | 4 | 0.35 |
| WA | 345 | 0.42 | 4 | 0.5 | 100 | 4 | 0.35 |
| WA | 346 | 0.14 | 4 | 0.3 | 150 | 4 | 0.35 |
| WA | 347 | 0.28 | 4 | 0.5 | 150 | 4 | 0.35 |
| WA | 348 | 0.42 | 4 | 0.4 | 150 | 4 | 0.35 |
| WA | 349 | 0.14 | 4 | 0.5 | 200 | 4 | 0.35 |
| WA | 350 | 0.28 | 4 | 0.4 | 200 | 4 | 0.35 |
| WA | 351 | 0.42 | 4 | 0.3 | 200 | 4 | 0.35 |
| WA | 352 | 0.28 | 2 | 0.5 | 100 | 4 | 0.5  |
| WA | 353 | 0.42 | 2 | 0.4 | 100 | 4 | 0.5  |
| WA | 354 | 0.14 | 2 | 0.3 | 100 | 4 | 0.5  |
| WA | 355 | 0.28 | 2 | 0.4 | 150 | 4 | 0.5  |
| WA | 356 | 0.14 | 2 | 0.5 | 150 | 4 | 0.5  |
| WA | 357 | 0.42 | 2 | 0.3 | 150 | 4 | 0.5  |
| WA | 358 | 0.42 | 2 | 0.5 | 200 | 4 | 0.5  |
| WA | 359 | 0.14 | 2 | 0.4 | 200 | 4 | 0.5  |
| WA | 360 | 0.28 | 2 | 0.3 | 200 | 4 | 0.5  |
| WA | 361 | 0.28 | 3 | 0.4 | 100 | 4 | 0.5  |
| WA | 362 | 0.42 | 3 | 0.3 | 100 | 4 | 0.5  |
| WA | 363 | 0.14 | 3 | 0.5 | 100 | 4 | 0.5  |
| WA | 364 | 0.28 | 3 | 0.3 | 150 | 4 | 0.5  |
| WA | 365 | 0.42 | 3 | 0.5 | 150 | 4 | 0.5  |
| WA | 366 | 0.14 | 3 | 0.4 | 150 | 4 | 0.5  |
| WA | 367 | 0.42 | 3 | 0.4 | 200 | 4 | 0.5  |
| WA | 368 | 0.28 | 3 | 0.5 | 200 | 4 | 0.5  |
| WA | 369 | 0.14 | 3 | 0.3 | 200 | 4 | 0.5  |
| WA | 370 | 0.28 | 4 | 0.3 | 100 | 4 | 0.5  |
| WA | 371 | 0.14 | 4 | 0.4 | 100 | 4 | 0.5  |
| WA | 372 | 0.42 | 4 | 0.5 | 100 | 4 | 0.5  |
| WA | 373 | 0.14 | 4 | 0.3 | 150 | 4 | 0.5  |
| WA | 374 | 0.28 | 4 | 0.5 | 150 | 4 | 0.5  |
| WA | 375 | 0.42 | 4 | 0.4 | 150 | 4 | 0.5  |
| WA | 376 | 0.14 | 4 | 0.5 | 200 | 4 | 0.5  |
| WA | 377 | 0.28 | 4 | 0.4 | 200 | 4 | 0.5  |
| WA | 378 | 0.42 | 4 | 0.3 | 200 | 4 | 0.5  |
| WA | 379 | 0.28 | 2 | 0.5 | 100 | 4 | 0.65 |
| WA | 380 | 0.42 | 2 | 0.4 | 100 | 4 | 0.65 |
| WA | 381 | 0.14 | 2 | 0.3 | 100 | 4 | 0.65 |
| WA | 382 | 0.28 | 2 | 0.4 | 150 | 4 | 0.65 |
| WA | 383 | 0.14 | 2 | 0.5 | 150 | 4 | 0.65 |
| WA | 384 | 0.42 | 2 | 0.3 | 150 | 4 | 0.65 |
| WA | 385 | 0.42 | 2 | 0.5 | 200 | 4 | 0.65 |
| WA | 386 | 0.14 | 2 | 0.4 | 200 | 4 | 0.65 |
| WA | 387 | 0.28 | 2 | 0.3 | 200 | 4 | 0.65 |
| WA | 388 | 0.28 | 3 | 0.4 | 100 | 4 | 0.65 |
| WA | 389 | 0.42 | 3 | 0.3 | 100 | 4 | 0.65 |
| WA | 390 | 0.14 | 3 | 0.5 | 100 | 4 | 0.65 |



|    |     |      |   |     |     |    |      |
|----|-----|------|---|-----|-----|----|------|
| WA | 391 | 0.28 | 3 | 0.3 | 150 | 4  | 0.65 |
| WA | 392 | 0.42 | 3 | 0.5 | 150 | 4  | 0.65 |
| WA | 393 | 0.14 | 3 | 0.4 | 150 | 4  | 0.65 |
| WA | 394 | 0.42 | 3 | 0.4 | 200 | 4  | 0.65 |
| WA | 395 | 0.28 | 3 | 0.5 | 200 | 4  | 0.65 |
| WA | 396 | 0.14 | 3 | 0.3 | 200 | 4  | 0.65 |
| WA | 397 | 0.28 | 4 | 0.3 | 100 | 4  | 0.65 |
| WA | 398 | 0.14 | 4 | 0.4 | 100 | 4  | 0.65 |
| WA | 399 | 0.42 | 4 | 0.5 | 100 | 4  | 0.65 |
| WA | 400 | 0.14 | 4 | 0.3 | 150 | 4  | 0.65 |
| WA | 401 | 0.28 | 4 | 0.5 | 150 | 4  | 0.65 |
| WA | 402 | 0.42 | 4 | 0.4 | 150 | 4  | 0.65 |
| WA | 403 | 0.14 | 4 | 0.5 | 200 | 4  | 0.65 |
| WA | 404 | 0.28 | 4 | 0.4 | 200 | 4  | 0.65 |
| WA | 405 | 0.42 | 4 | 0.3 | 200 | 4  | 0.65 |
| WA | 406 | 0.28 | 2 | 0.5 | 100 | 10 | 0.35 |
| WA | 407 | 0.42 | 2 | 0.4 | 100 | 10 | 0.35 |
| WA | 408 | 0.14 | 2 | 0.3 | 100 | 10 | 0.35 |
| WA | 409 | 0.28 | 2 | 0.4 | 150 | 10 | 0.35 |
| WA | 410 | 0.14 | 2 | 0.5 | 150 | 10 | 0.35 |
| WA | 411 | 0.42 | 2 | 0.3 | 150 | 10 | 0.35 |
| WA | 412 | 0.42 | 2 | 0.5 | 200 | 10 | 0.35 |
| WA | 413 | 0.14 | 2 | 0.4 | 200 | 10 | 0.35 |
| WA | 414 | 0.28 | 2 | 0.3 | 200 | 10 | 0.35 |
| WA | 415 | 0.28 | 3 | 0.4 | 100 | 10 | 0.35 |
| WA | 416 | 0.42 | 3 | 0.3 | 100 | 10 | 0.35 |
| WA | 417 | 0.14 | 3 | 0.5 | 100 | 10 | 0.35 |
| WA | 418 | 0.28 | 3 | 0.3 | 150 | 10 | 0.35 |
| WA | 419 | 0.42 | 3 | 0.5 | 150 | 10 | 0.35 |
| WA | 420 | 0.14 | 3 | 0.4 | 150 | 10 | 0.35 |
| WA | 421 | 0.42 | 3 | 0.4 | 200 | 10 | 0.35 |
| WA | 422 | 0.28 | 3 | 0.5 | 200 | 10 | 0.35 |
| WA | 423 | 0.14 | 3 | 0.3 | 200 | 10 | 0.35 |
| WA | 424 | 0.28 | 4 | 0.3 | 100 | 10 | 0.35 |
| WA | 425 | 0.14 | 4 | 0.4 | 100 | 10 | 0.35 |
| WA | 426 | 0.42 | 4 | 0.5 | 100 | 10 | 0.35 |
| WA | 427 | 0.14 | 4 | 0.3 | 150 | 10 | 0.35 |
| WA | 428 | 0.28 | 4 | 0.5 | 150 | 10 | 0.35 |
| WA | 429 | 0.42 | 4 | 0.4 | 150 | 10 | 0.35 |
| WA | 430 | 0.14 | 4 | 0.5 | 200 | 10 | 0.35 |
| WA | 431 | 0.28 | 4 | 0.4 | 200 | 10 | 0.35 |
| WA | 432 | 0.42 | 4 | 0.3 | 200 | 10 | 0.35 |
| WA | 433 | 0.28 | 2 | 0.5 | 100 | 10 | 0.5  |
| WA | 434 | 0.42 | 2 | 0.4 | 100 | 10 | 0.5  |
| WA | 435 | 0.14 | 2 | 0.3 | 100 | 10 | 0.5  |
| WA | 436 | 0.28 | 2 | 0.4 | 150 | 10 | 0.5  |
| WA | 437 | 0.14 | 2 | 0.5 | 150 | 10 | 0.5  |
| WA | 438 | 0.42 | 2 | 0.3 | 150 | 10 | 0.5  |
| WA | 439 | 0.42 | 2 | 0.5 | 200 | 10 | 0.5  |
| WA | 440 | 0.14 | 2 | 0.4 | 200 | 10 | 0.5  |

|    |     |      |   |     |     |    |      |
|----|-----|------|---|-----|-----|----|------|
| WA | 441 | 0.28 | 2 | 0.3 | 200 | 10 | 0.5  |
| WA | 442 | 0.28 | 3 | 0.4 | 100 | 10 | 0.5  |
| WA | 443 | 0.42 | 3 | 0.3 | 100 | 10 | 0.5  |
| WA | 444 | 0.14 | 3 | 0.5 | 100 | 10 | 0.5  |
| WA | 445 | 0.28 | 3 | 0.3 | 150 | 10 | 0.5  |
| WA | 446 | 0.42 | 3 | 0.5 | 150 | 10 | 0.5  |
| WA | 447 | 0.14 | 3 | 0.4 | 150 | 10 | 0.5  |
| WA | 448 | 0.42 | 3 | 0.4 | 200 | 10 | 0.5  |
| WA | 449 | 0.28 | 3 | 0.5 | 200 | 10 | 0.5  |
| WA | 450 | 0.14 | 3 | 0.3 | 200 | 10 | 0.5  |
| WA | 451 | 0.28 | 4 | 0.3 | 100 | 10 | 0.5  |
| WA | 452 | 0.14 | 4 | 0.4 | 100 | 10 | 0.5  |
| WA | 453 | 0.42 | 4 | 0.5 | 100 | 10 | 0.5  |
| WA | 454 | 0.14 | 4 | 0.3 | 150 | 10 | 0.5  |
| WA | 455 | 0.28 | 4 | 0.5 | 150 | 10 | 0.5  |
| WA | 456 | 0.42 | 4 | 0.4 | 150 | 10 | 0.5  |
| WA | 457 | 0.14 | 4 | 0.5 | 200 | 10 | 0.5  |
| WA | 458 | 0.28 | 4 | 0.4 | 200 | 10 | 0.5  |
| WA | 459 | 0.42 | 4 | 0.3 | 200 | 10 | 0.5  |
| WA | 460 | 0.28 | 2 | 0.5 | 100 | 10 | 0.65 |
| WA | 461 | 0.42 | 2 | 0.4 | 100 | 10 | 0.65 |
| WA | 462 | 0.14 | 2 | 0.3 | 100 | 10 | 0.65 |
| WA | 463 | 0.28 | 2 | 0.4 | 150 | 10 | 0.65 |
| WA | 464 | 0.14 | 2 | 0.5 | 150 | 10 | 0.65 |
| WA | 465 | 0.42 | 2 | 0.3 | 150 | 10 | 0.65 |
| WA | 466 | 0.42 | 2 | 0.5 | 200 | 10 | 0.65 |
| WA | 467 | 0.14 | 2 | 0.4 | 200 | 10 | 0.65 |
| WA | 468 | 0.28 | 2 | 0.3 | 200 | 10 | 0.65 |
| WA | 469 | 0.28 | 3 | 0.4 | 100 | 10 | 0.65 |
| WA | 470 | 0.42 | 3 | 0.3 | 100 | 10 | 0.65 |
| WA | 471 | 0.14 | 3 | 0.5 | 100 | 10 | 0.65 |
| WA | 472 | 0.28 | 3 | 0.3 | 150 | 10 | 0.65 |
| WA | 473 | 0.42 | 3 | 0.5 | 150 | 10 | 0.65 |
| WA | 474 | 0.14 | 3 | 0.4 | 150 | 10 | 0.65 |
| WA | 475 | 0.42 | 3 | 0.4 | 200 | 10 | 0.65 |
| WA | 476 | 0.28 | 3 | 0.5 | 200 | 10 | 0.65 |
| WA | 477 | 0.14 | 3 | 0.3 | 200 | 10 | 0.65 |
| WA | 478 | 0.28 | 4 | 0.3 | 100 | 10 | 0.65 |
| WA | 479 | 0.14 | 4 | 0.4 | 100 | 10 | 0.65 |
| WA | 480 | 0.42 | 4 | 0.5 | 100 | 10 | 0.65 |
| WA | 481 | 0.14 | 4 | 0.3 | 150 | 10 | 0.65 |
| WA | 482 | 0.28 | 4 | 0.5 | 150 | 10 | 0.65 |
| WA | 483 | 0.42 | 4 | 0.4 | 150 | 10 | 0.65 |
| WA | 484 | 0.14 | 4 | 0.5 | 200 | 10 | 0.65 |
| WA | 485 | 0.28 | 4 | 0.4 | 200 | 10 | 0.65 |
| WA | 486 | 0.42 | 4 | 0.3 | 200 | 10 | 0.65 |
|    |     |      |   |     |     |    |      |
| WB | 1   | 0.10 | 2 | 0.5 | 100 | 0  | 0.35 |
| WB | 2   | 0.15 | 2 | 0.4 | 100 | 0  | 0.35 |
| WB | 3   | 0.05 | 2 | 0.3 | 100 | 0  | 0.35 |

|    |    |      |   |     |     |   |      |
|----|----|------|---|-----|-----|---|------|
| WB | 4  | 0.10 | 2 | 0.4 | 150 | 0 | 0.35 |
| WB | 5  | 0.05 | 2 | 0.5 | 150 | 0 | 0.35 |
| WB | 6  | 0.15 | 2 | 0.3 | 150 | 0 | 0.35 |
| WB | 7  | 0.15 | 2 | 0.5 | 200 | 0 | 0.35 |
| WB | 8  | 0.05 | 2 | 0.4 | 200 | 0 | 0.35 |
| WB | 9  | 0.10 | 2 | 0.3 | 200 | 0 | 0.35 |
| WB | 10 | 0.10 | 3 | 0.4 | 100 | 0 | 0.35 |
| WB | 11 | 0.15 | 3 | 0.3 | 100 | 0 | 0.35 |
| WB | 12 | 0.05 | 3 | 0.5 | 100 | 0 | 0.35 |
| WB | 13 | 0.10 | 3 | 0.3 | 150 | 0 | 0.35 |
| WB | 14 | 0.15 | 3 | 0.5 | 150 | 0 | 0.35 |
| WB | 15 | 0.05 | 3 | 0.4 | 150 | 0 | 0.35 |
| WB | 16 | 0.15 | 3 | 0.4 | 200 | 0 | 0.35 |
| WB | 17 | 0.10 | 3 | 0.5 | 200 | 0 | 0.35 |
| WB | 18 | 0.05 | 3 | 0.3 | 200 | 0 | 0.35 |
| WB | 19 | 0.10 | 4 | 0.3 | 100 | 0 | 0.35 |
| WB | 20 | 0.05 | 4 | 0.4 | 100 | 0 | 0.35 |
| WB | 21 | 0.15 | 4 | 0.5 | 100 | 0 | 0.35 |
| WB | 22 | 0.05 | 4 | 0.3 | 150 | 0 | 0.35 |
| WB | 23 | 0.10 | 4 | 0.5 | 150 | 0 | 0.35 |
| WB | 24 | 0.15 | 4 | 0.4 | 150 | 0 | 0.35 |
| WB | 25 | 0.05 | 4 | 0.5 | 200 | 0 | 0.35 |
| WB | 26 | 0.10 | 4 | 0.4 | 200 | 0 | 0.35 |
| WB | 27 | 0.15 | 4 | 0.3 | 200 | 0 | 0.35 |
| WB | 28 | 0.10 | 2 | 0.5 | 100 | 0 | 0.5  |
| WB | 29 | 0.15 | 2 | 0.4 | 100 | 0 | 0.5  |
| WB | 30 | 0.05 | 2 | 0.3 | 100 | 0 | 0.5  |
| WB | 31 | 0.10 | 2 | 0.4 | 150 | 0 | 0.5  |
| WB | 32 | 0.05 | 2 | 0.5 | 150 | 0 | 0.5  |
| WB | 33 | 0.15 | 2 | 0.3 | 150 | 0 | 0.5  |
| WB | 34 | 0.15 | 2 | 0.5 | 200 | 0 | 0.5  |
| WB | 35 | 0.05 | 2 | 0.4 | 200 | 0 | 0.5  |
| WB | 36 | 0.10 | 2 | 0.3 | 200 | 0 | 0.5  |
| WB | 37 | 0.10 | 3 | 0.4 | 100 | 0 | 0.5  |
| WB | 38 | 0.15 | 3 | 0.3 | 100 | 0 | 0.5  |
| WB | 39 | 0.05 | 3 | 0.5 | 100 | 0 | 0.5  |
| WB | 40 | 0.10 | 3 | 0.3 | 150 | 0 | 0.5  |
| WB | 41 | 0.15 | 3 | 0.5 | 150 | 0 | 0.5  |
| WB | 42 | 0.05 | 3 | 0.4 | 150 | 0 | 0.5  |
| WB | 43 | 0.15 | 3 | 0.4 | 200 | 0 | 0.5  |
| WB | 44 | 0.10 | 3 | 0.5 | 200 | 0 | 0.5  |
| WB | 45 | 0.05 | 3 | 0.3 | 200 | 0 | 0.5  |
| WB | 46 | 0.10 | 4 | 0.3 | 100 | 0 | 0.5  |
| WB | 47 | 0.05 | 4 | 0.4 | 100 | 0 | 0.5  |
| WB | 48 | 0.15 | 4 | 0.5 | 100 | 0 | 0.5  |
| WB | 49 | 0.05 | 4 | 0.3 | 150 | 0 | 0.5  |
| WB | 50 | 0.10 | 4 | 0.5 | 150 | 0 | 0.5  |
| WB | 51 | 0.15 | 4 | 0.4 | 150 | 0 | 0.5  |
| WB | 52 | 0.05 | 4 | 0.5 | 200 | 0 | 0.5  |
| WB | 53 | 0.10 | 4 | 0.4 | 200 | 0 | 0.5  |

|    |     |      |   |     |     |   |      |
|----|-----|------|---|-----|-----|---|------|
| WB | 54  | 0.15 | 4 | 0.3 | 200 | 0 | 0.5  |
| WB | 55  | 0.10 | 2 | 0.5 | 100 | 0 | 0.65 |
| WB | 56  | 0.15 | 2 | 0.4 | 100 | 0 | 0.65 |
| WB | 57  | 0.05 | 2 | 0.3 | 100 | 0 | 0.65 |
| WB | 58  | 0.10 | 2 | 0.4 | 150 | 0 | 0.65 |
| WB | 59  | 0.05 | 2 | 0.5 | 150 | 0 | 0.65 |
| WB | 60  | 0.15 | 2 | 0.3 | 150 | 0 | 0.65 |
| WB | 61  | 0.15 | 2 | 0.5 | 200 | 0 | 0.65 |
| WB | 62  | 0.05 | 2 | 0.4 | 200 | 0 | 0.65 |
| WB | 63  | 0.10 | 2 | 0.3 | 200 | 0 | 0.65 |
| WB | 64  | 0.10 | 3 | 0.4 | 100 | 0 | 0.65 |
| WB | 65  | 0.15 | 3 | 0.3 | 100 | 0 | 0.65 |
| WB | 66  | 0.05 | 3 | 0.5 | 100 | 0 | 0.65 |
| WB | 67  | 0.10 | 3 | 0.3 | 150 | 0 | 0.65 |
| WB | 68  | 0.15 | 3 | 0.5 | 150 | 0 | 0.65 |
| WB | 69  | 0.05 | 3 | 0.4 | 150 | 0 | 0.65 |
| WB | 70  | 0.15 | 3 | 0.4 | 200 | 0 | 0.65 |
| WB | 71  | 0.10 | 3 | 0.5 | 200 | 0 | 0.65 |
| WB | 72  | 0.05 | 3 | 0.3 | 200 | 0 | 0.65 |
| WB | 73  | 0.10 | 4 | 0.3 | 100 | 0 | 0.65 |
| WB | 74  | 0.05 | 4 | 0.4 | 100 | 0 | 0.65 |
| WB | 75  | 0.15 | 4 | 0.5 | 100 | 0 | 0.65 |
| WB | 76  | 0.05 | 4 | 0.3 | 150 | 0 | 0.65 |
| WB | 77  | 0.10 | 4 | 0.5 | 150 | 0 | 0.65 |
| WB | 78  | 0.15 | 4 | 0.4 | 150 | 0 | 0.65 |
| WB | 79  | 0.05 | 4 | 0.5 | 200 | 0 | 0.65 |
| WB | 80  | 0.10 | 4 | 0.4 | 200 | 0 | 0.65 |
| WB | 81  | 0.15 | 4 | 0.3 | 200 | 0 | 0.65 |
| WB | 82  | 0.10 | 2 | 0.5 | 100 | 1 | 0.35 |
| WB | 83  | 0.15 | 2 | 0.4 | 100 | 1 | 0.35 |
| WB | 84  | 0.05 | 2 | 0.3 | 100 | 1 | 0.35 |
| WB | 85  | 0.10 | 2 | 0.4 | 150 | 1 | 0.35 |
| WB | 86  | 0.05 | 2 | 0.5 | 150 | 1 | 0.35 |
| WB | 87  | 0.15 | 2 | 0.3 | 150 | 1 | 0.35 |
| WB | 88  | 0.15 | 2 | 0.5 | 200 | 1 | 0.35 |
| WB | 89  | 0.05 | 2 | 0.4 | 200 | 1 | 0.35 |
| WB | 90  | 0.10 | 2 | 0.3 | 200 | 1 | 0.35 |
| WB | 91  | 0.10 | 3 | 0.4 | 100 | 1 | 0.35 |
| WB | 92  | 0.15 | 3 | 0.3 | 100 | 1 | 0.35 |
| WB | 93  | 0.05 | 3 | 0.5 | 100 | 1 | 0.35 |
| WB | 94  | 0.10 | 3 | 0.3 | 150 | 1 | 0.35 |
| WB | 95  | 0.15 | 3 | 0.5 | 150 | 1 | 0.35 |
| WB | 96  | 0.05 | 3 | 0.4 | 150 | 1 | 0.35 |
| WB | 97  | 0.15 | 3 | 0.4 | 200 | 1 | 0.35 |
| WB | 98  | 0.10 | 3 | 0.5 | 200 | 1 | 0.35 |
| WB | 99  | 0.05 | 3 | 0.3 | 200 | 1 | 0.35 |
| WB | 100 | 0.10 | 4 | 0.3 | 100 | 1 | 0.35 |
| WB | 101 | 0.05 | 4 | 0.4 | 100 | 1 | 0.35 |
| WB | 102 | 0.15 | 4 | 0.5 | 100 | 1 | 0.35 |
| WB | 103 | 0.05 | 4 | 0.3 | 150 | 1 | 0.35 |

|    |     |      |   |     |     |   |      |
|----|-----|------|---|-----|-----|---|------|
| WB | 104 | 0.10 | 4 | 0.5 | 150 | 1 | 0.35 |
| WB | 105 | 0.15 | 4 | 0.4 | 150 | 1 | 0.35 |
| WB | 106 | 0.05 | 4 | 0.5 | 200 | 1 | 0.35 |
| WB | 107 | 0.10 | 4 | 0.4 | 200 | 1 | 0.35 |
| WB | 108 | 0.15 | 4 | 0.3 | 200 | 1 | 0.35 |
| WB | 109 | 0.10 | 2 | 0.5 | 100 | 1 | 0.5  |
| WB | 110 | 0.15 | 2 | 0.4 | 100 | 1 | 0.5  |
| WB | 111 | 0.05 | 2 | 0.3 | 100 | 1 | 0.5  |
| WB | 112 | 0.10 | 2 | 0.4 | 150 | 1 | 0.5  |
| WB | 113 | 0.05 | 2 | 0.5 | 150 | 1 | 0.5  |
| WB | 114 | 0.15 | 2 | 0.3 | 150 | 1 | 0.5  |
| WB | 115 | 0.15 | 2 | 0.5 | 200 | 1 | 0.5  |
| WB | 116 | 0.05 | 2 | 0.4 | 200 | 1 | 0.5  |
| WB | 117 | 0.10 | 2 | 0.3 | 200 | 1 | 0.5  |
| WB | 118 | 0.10 | 3 | 0.4 | 100 | 1 | 0.5  |
| WB | 119 | 0.15 | 3 | 0.3 | 100 | 1 | 0.5  |
| WB | 120 | 0.05 | 3 | 0.5 | 100 | 1 | 0.5  |
| WB | 121 | 0.10 | 3 | 0.3 | 150 | 1 | 0.5  |
| WB | 122 | 0.15 | 3 | 0.5 | 150 | 1 | 0.5  |
| WB | 123 | 0.05 | 3 | 0.4 | 150 | 1 | 0.5  |
| WB | 124 | 0.15 | 3 | 0.4 | 200 | 1 | 0.5  |
| WB | 125 | 0.10 | 3 | 0.5 | 200 | 1 | 0.5  |
| WB | 126 | 0.05 | 3 | 0.3 | 200 | 1 | 0.5  |
| WB | 127 | 0.10 | 4 | 0.3 | 100 | 1 | 0.5  |
| WB | 128 | 0.05 | 4 | 0.4 | 100 | 1 | 0.5  |
| WB | 129 | 0.15 | 4 | 0.5 | 100 | 1 | 0.5  |
| WB | 130 | 0.05 | 4 | 0.3 | 150 | 1 | 0.5  |
| WB | 131 | 0.10 | 4 | 0.5 | 150 | 1 | 0.5  |
| WB | 132 | 0.15 | 4 | 0.4 | 150 | 1 | 0.5  |
| WB | 133 | 0.05 | 4 | 0.5 | 200 | 1 | 0.5  |
| WB | 134 | 0.10 | 4 | 0.4 | 200 | 1 | 0.5  |
| WB | 135 | 0.15 | 4 | 0.3 | 200 | 1 | 0.5  |
| WB | 136 | 0.10 | 2 | 0.5 | 100 | 1 | 0.65 |
| WB | 137 | 0.15 | 2 | 0.4 | 100 | 1 | 0.65 |
| WB | 138 | 0.05 | 2 | 0.3 | 100 | 1 | 0.65 |
| WB | 139 | 0.10 | 2 | 0.4 | 150 | 1 | 0.65 |
| WB | 140 | 0.05 | 2 | 0.5 | 150 | 1 | 0.65 |
| WB | 141 | 0.15 | 2 | 0.3 | 150 | 1 | 0.65 |
| WB | 142 | 0.15 | 2 | 0.5 | 200 | 1 | 0.65 |
| WB | 143 | 0.05 | 2 | 0.4 | 200 | 1 | 0.65 |
| WB | 144 | 0.10 | 2 | 0.3 | 200 | 1 | 0.65 |
| WB | 145 | 0.10 | 3 | 0.4 | 100 | 1 | 0.65 |
| WB | 146 | 0.15 | 3 | 0.3 | 100 | 1 | 0.65 |
| WB | 147 | 0.05 | 3 | 0.5 | 100 | 1 | 0.65 |
| WB | 148 | 0.10 | 3 | 0.3 | 150 | 1 | 0.65 |
| WB | 149 | 0.15 | 3 | 0.5 | 150 | 1 | 0.65 |
| WB | 150 | 0.05 | 3 | 0.4 | 150 | 1 | 0.65 |
| WB | 151 | 0.15 | 3 | 0.4 | 200 | 1 | 0.65 |
| WB | 152 | 0.10 | 3 | 0.5 | 200 | 1 | 0.65 |
| WB | 153 | 0.05 | 3 | 0.3 | 200 | 1 | 0.65 |

|    |     |      |   |     |     |   |      |
|----|-----|------|---|-----|-----|---|------|
| WB | 154 | 0.10 | 4 | 0.3 | 100 | 1 | 0.65 |
| WB | 155 | 0.05 | 4 | 0.4 | 100 | 1 | 0.65 |
| WB | 156 | 0.15 | 4 | 0.5 | 100 | 1 | 0.65 |
| WB | 157 | 0.05 | 4 | 0.3 | 150 | 1 | 0.65 |
| WB | 158 | 0.10 | 4 | 0.5 | 150 | 1 | 0.65 |
| WB | 159 | 0.15 | 4 | 0.4 | 150 | 1 | 0.65 |
| WB | 160 | 0.05 | 4 | 0.5 | 200 | 1 | 0.65 |
| WB | 161 | 0.10 | 4 | 0.4 | 200 | 1 | 0.65 |
| WB | 162 | 0.15 | 4 | 0.3 | 200 | 1 | 0.65 |
| WB | 163 | 0.10 | 2 | 0.5 | 100 | 2 | 0.35 |
| WB | 164 | 0.15 | 2 | 0.4 | 100 | 2 | 0.35 |
| WB | 165 | 0.05 | 2 | 0.3 | 100 | 2 | 0.35 |
| WB | 166 | 0.10 | 2 | 0.4 | 150 | 2 | 0.35 |
| WB | 167 | 0.05 | 2 | 0.5 | 150 | 2 | 0.35 |
| WB | 168 | 0.15 | 2 | 0.3 | 150 | 2 | 0.35 |
| WB | 169 | 0.15 | 2 | 0.5 | 200 | 2 | 0.35 |
| WB | 170 | 0.05 | 2 | 0.4 | 200 | 2 | 0.35 |
| WB | 171 | 0.10 | 2 | 0.3 | 200 | 2 | 0.35 |
| WB | 172 | 0.10 | 3 | 0.4 | 100 | 2 | 0.35 |
| WB | 173 | 0.15 | 3 | 0.3 | 100 | 2 | 0.35 |
| WB | 174 | 0.05 | 3 | 0.5 | 100 | 2 | 0.35 |
| WB | 175 | 0.10 | 3 | 0.3 | 150 | 2 | 0.35 |
| WB | 176 | 0.15 | 3 | 0.5 | 150 | 2 | 0.35 |
| WB | 177 | 0.05 | 3 | 0.4 | 150 | 2 | 0.35 |
| WB | 178 | 0.15 | 3 | 0.4 | 200 | 2 | 0.35 |
| WB | 179 | 0.10 | 3 | 0.5 | 200 | 2 | 0.35 |
| WB | 180 | 0.05 | 3 | 0.3 | 200 | 2 | 0.35 |
| WB | 181 | 0.10 | 4 | 0.3 | 100 | 2 | 0.35 |
| WB | 182 | 0.05 | 4 | 0.4 | 100 | 2 | 0.35 |
| WB | 183 | 0.15 | 4 | 0.5 | 100 | 2 | 0.35 |
| WB | 184 | 0.05 | 4 | 0.3 | 150 | 2 | 0.35 |
| WB | 185 | 0.10 | 4 | 0.5 | 150 | 2 | 0.35 |
| WB | 186 | 0.15 | 4 | 0.4 | 150 | 2 | 0.35 |
| WB | 187 | 0.05 | 4 | 0.5 | 200 | 2 | 0.35 |
| WB | 188 | 0.10 | 4 | 0.4 | 200 | 2 | 0.35 |
| WB | 189 | 0.15 | 4 | 0.3 | 200 | 2 | 0.35 |
| WB | 190 | 0.10 | 2 | 0.5 | 100 | 2 | 0.5  |
| WB | 191 | 0.15 | 2 | 0.4 | 100 | 2 | 0.5  |
| WB | 192 | 0.05 | 2 | 0.3 | 100 | 2 | 0.5  |
| WB | 193 | 0.10 | 2 | 0.4 | 150 | 2 | 0.5  |
| WB | 194 | 0.05 | 2 | 0.5 | 150 | 2 | 0.5  |
| WB | 195 | 0.15 | 2 | 0.3 | 150 | 2 | 0.5  |
| WB | 196 | 0.15 | 2 | 0.5 | 200 | 2 | 0.5  |
| WB | 197 | 0.05 | 2 | 0.4 | 200 | 2 | 0.5  |
| WB | 198 | 0.10 | 2 | 0.3 | 200 | 2 | 0.5  |
| WB | 199 | 0.10 | 3 | 0.4 | 100 | 2 | 0.5  |
| WB | 200 | 0.15 | 3 | 0.3 | 100 | 2 | 0.5  |
| WB | 201 | 0.05 | 3 | 0.5 | 100 | 2 | 0.5  |
| WB | 202 | 0.10 | 3 | 0.3 | 150 | 2 | 0.5  |
| WB | 203 | 0.15 | 3 | 0.5 | 150 | 2 | 0.5  |

|    |     |      |   |     |     |   |      |
|----|-----|------|---|-----|-----|---|------|
| WB | 204 | 0.05 | 3 | 0.4 | 150 | 2 | 0.5  |
| WB | 205 | 0.15 | 3 | 0.4 | 200 | 2 | 0.5  |
| WB | 206 | 0.10 | 3 | 0.5 | 200 | 2 | 0.5  |
| WB | 207 | 0.05 | 3 | 0.3 | 200 | 2 | 0.5  |
| WB | 208 | 0.10 | 4 | 0.3 | 100 | 2 | 0.5  |
| WB | 209 | 0.05 | 4 | 0.4 | 100 | 2 | 0.5  |
| WB | 210 | 0.15 | 4 | 0.5 | 100 | 2 | 0.5  |
| WB | 211 | 0.05 | 4 | 0.3 | 150 | 2 | 0.5  |
| WB | 212 | 0.10 | 4 | 0.5 | 150 | 2 | 0.5  |
| WB | 213 | 0.15 | 4 | 0.4 | 150 | 2 | 0.5  |
| WB | 214 | 0.05 | 4 | 0.5 | 200 | 2 | 0.5  |
| WB | 215 | 0.10 | 4 | 0.4 | 200 | 2 | 0.5  |
| WB | 216 | 0.15 | 4 | 0.3 | 200 | 2 | 0.5  |
| WB | 217 | 0.10 | 2 | 0.5 | 100 | 2 | 0.65 |
| WB | 218 | 0.15 | 2 | 0.4 | 100 | 2 | 0.65 |
| WB | 219 | 0.05 | 2 | 0.3 | 100 | 2 | 0.65 |
| WB | 220 | 0.10 | 2 | 0.4 | 150 | 2 | 0.65 |
| WB | 221 | 0.05 | 2 | 0.5 | 150 | 2 | 0.65 |
| WB | 222 | 0.15 | 2 | 0.3 | 150 | 2 | 0.65 |
| WB | 223 | 0.15 | 2 | 0.5 | 200 | 2 | 0.65 |
| WB | 224 | 0.05 | 2 | 0.4 | 200 | 2 | 0.65 |
| WB | 225 | 0.10 | 2 | 0.3 | 200 | 2 | 0.65 |
| WB | 226 | 0.10 | 3 | 0.4 | 100 | 2 | 0.65 |
| WB | 227 | 0.15 | 3 | 0.3 | 100 | 2 | 0.65 |
| WB | 228 | 0.05 | 3 | 0.5 | 100 | 2 | 0.65 |
| WB | 229 | 0.10 | 3 | 0.3 | 150 | 2 | 0.65 |
| WB | 230 | 0.15 | 3 | 0.5 | 150 | 2 | 0.65 |
| WB | 231 | 0.05 | 3 | 0.4 | 150 | 2 | 0.65 |
| WB | 232 | 0.15 | 3 | 0.4 | 200 | 2 | 0.65 |
| WB | 233 | 0.10 | 3 | 0.5 | 200 | 2 | 0.65 |
| WB | 234 | 0.05 | 3 | 0.3 | 200 | 2 | 0.65 |
| WB | 235 | 0.10 | 4 | 0.3 | 100 | 2 | 0.65 |
| WB | 236 | 0.05 | 4 | 0.4 | 100 | 2 | 0.65 |
| WB | 237 | 0.15 | 4 | 0.5 | 100 | 2 | 0.65 |
| WB | 238 | 0.05 | 4 | 0.3 | 150 | 2 | 0.65 |
| WB | 239 | 0.10 | 4 | 0.5 | 150 | 2 | 0.65 |
| WB | 240 | 0.15 | 4 | 0.4 | 150 | 2 | 0.65 |
| WB | 241 | 0.05 | 4 | 0.5 | 200 | 2 | 0.65 |
| WB | 242 | 0.10 | 4 | 0.4 | 200 | 2 | 0.65 |
| WB | 243 | 0.15 | 4 | 0.3 | 200 | 2 | 0.65 |
| WB | 244 | 0.10 | 2 | 0.5 | 100 | 3 | 0.35 |
| WB | 245 | 0.15 | 2 | 0.4 | 100 | 3 | 0.35 |
| WB | 246 | 0.05 | 2 | 0.3 | 100 | 3 | 0.35 |
| WB | 247 | 0.10 | 2 | 0.4 | 150 | 3 | 0.35 |
| WB | 248 | 0.05 | 2 | 0.5 | 150 | 3 | 0.35 |
| WB | 249 | 0.15 | 2 | 0.3 | 150 | 3 | 0.35 |
| WB | 250 | 0.15 | 2 | 0.5 | 200 | 3 | 0.35 |
| WB | 251 | 0.05 | 2 | 0.4 | 200 | 3 | 0.35 |
| WB | 252 | 0.10 | 2 | 0.3 | 200 | 3 | 0.35 |
| WB | 253 | 0.10 | 3 | 0.4 | 100 | 3 | 0.35 |

|    |     |      |   |     |     |   |      |
|----|-----|------|---|-----|-----|---|------|
| WB | 254 | 0.15 | 3 | 0.3 | 100 | 3 | 0.35 |
| WB | 255 | 0.05 | 3 | 0.5 | 100 | 3 | 0.35 |
| WB | 256 | 0.10 | 3 | 0.3 | 150 | 3 | 0.35 |
| WB | 257 | 0.15 | 3 | 0.5 | 150 | 3 | 0.35 |
| WB | 258 | 0.05 | 3 | 0.4 | 150 | 3 | 0.35 |
| WB | 259 | 0.15 | 3 | 0.4 | 200 | 3 | 0.35 |
| WB | 260 | 0.10 | 3 | 0.5 | 200 | 3 | 0.35 |
| WB | 261 | 0.05 | 3 | 0.3 | 200 | 3 | 0.35 |
| WB | 262 | 0.10 | 4 | 0.3 | 100 | 3 | 0.35 |
| WB | 263 | 0.05 | 4 | 0.4 | 100 | 3 | 0.35 |
| WB | 264 | 0.15 | 4 | 0.5 | 100 | 3 | 0.35 |
| WB | 265 | 0.05 | 4 | 0.3 | 150 | 3 | 0.35 |
| WB | 266 | 0.10 | 4 | 0.5 | 150 | 3 | 0.35 |
| WB | 267 | 0.15 | 4 | 0.4 | 150 | 3 | 0.35 |
| WB | 268 | 0.05 | 4 | 0.5 | 200 | 3 | 0.35 |
| WB | 269 | 0.10 | 4 | 0.4 | 200 | 3 | 0.35 |
| WB | 270 | 0.15 | 4 | 0.3 | 200 | 3 | 0.35 |
| WB | 271 | 0.10 | 2 | 0.5 | 100 | 3 | 0.5  |
| WB | 272 | 0.15 | 2 | 0.4 | 100 | 3 | 0.5  |
| WB | 273 | 0.05 | 2 | 0.3 | 100 | 3 | 0.5  |
| WB | 274 | 0.10 | 2 | 0.4 | 150 | 3 | 0.5  |
| WB | 275 | 0.05 | 2 | 0.5 | 150 | 3 | 0.5  |
| WB | 276 | 0.15 | 2 | 0.3 | 150 | 3 | 0.5  |
| WB | 277 | 0.15 | 2 | 0.5 | 200 | 3 | 0.5  |
| WB | 278 | 0.05 | 2 | 0.4 | 200 | 3 | 0.5  |
| WB | 279 | 0.10 | 2 | 0.3 | 200 | 3 | 0.5  |
| WB | 280 | 0.10 | 3 | 0.4 | 100 | 3 | 0.5  |
| WB | 281 | 0.15 | 3 | 0.3 | 100 | 3 | 0.5  |
| WB | 282 | 0.05 | 3 | 0.5 | 100 | 3 | 0.5  |
| WB | 283 | 0.10 | 3 | 0.3 | 150 | 3 | 0.5  |
| WB | 284 | 0.15 | 3 | 0.5 | 150 | 3 | 0.5  |
| WB | 285 | 0.05 | 3 | 0.4 | 150 | 3 | 0.5  |
| WB | 286 | 0.15 | 3 | 0.4 | 200 | 3 | 0.5  |
| WB | 287 | 0.10 | 3 | 0.5 | 200 | 3 | 0.5  |
| WB | 288 | 0.05 | 3 | 0.3 | 200 | 3 | 0.5  |
| WB | 289 | 0.10 | 4 | 0.3 | 100 | 3 | 0.5  |
| WB | 290 | 0.05 | 4 | 0.4 | 100 | 3 | 0.5  |
| WB | 291 | 0.15 | 4 | 0.5 | 100 | 3 | 0.5  |
| WB | 292 | 0.05 | 4 | 0.3 | 150 | 3 | 0.5  |
| WB | 293 | 0.10 | 4 | 0.5 | 150 | 3 | 0.5  |
| WB | 294 | 0.15 | 4 | 0.4 | 150 | 3 | 0.5  |
| WB | 295 | 0.05 | 4 | 0.5 | 200 | 3 | 0.5  |
| WB | 296 | 0.10 | 4 | 0.4 | 200 | 3 | 0.5  |
| WB | 297 | 0.15 | 4 | 0.3 | 200 | 3 | 0.5  |
| WB | 298 | 0.10 | 2 | 0.5 | 100 | 3 | 0.65 |
| WB | 299 | 0.15 | 2 | 0.4 | 100 | 3 | 0.65 |
| WB | 300 | 0.05 | 2 | 0.3 | 100 | 3 | 0.65 |
| WB | 301 | 0.10 | 2 | 0.4 | 150 | 3 | 0.65 |
| WB | 302 | 0.05 | 2 | 0.5 | 150 | 3 | 0.65 |
| WB | 303 | 0.15 | 2 | 0.3 | 150 | 3 | 0.65 |



|    |     |      |   |     |     |   |      |
|----|-----|------|---|-----|-----|---|------|
| WB | 304 | 0.15 | 2 | 0.5 | 200 | 3 | 0.65 |
| WB | 305 | 0.05 | 2 | 0.4 | 200 | 3 | 0.65 |
| WB | 306 | 0.10 | 2 | 0.3 | 200 | 3 | 0.65 |
| WB | 307 | 0.10 | 3 | 0.4 | 100 | 3 | 0.65 |
| WB | 308 | 0.15 | 3 | 0.3 | 100 | 3 | 0.65 |
| WB | 309 | 0.05 | 3 | 0.5 | 100 | 3 | 0.65 |
| WB | 310 | 0.10 | 3 | 0.3 | 150 | 3 | 0.65 |
| WB | 311 | 0.15 | 3 | 0.5 | 150 | 3 | 0.65 |
| WB | 312 | 0.05 | 3 | 0.4 | 150 | 3 | 0.65 |
| WB | 313 | 0.15 | 3 | 0.4 | 200 | 3 | 0.65 |
| WB | 314 | 0.10 | 3 | 0.5 | 200 | 3 | 0.65 |
| WB | 315 | 0.05 | 3 | 0.3 | 200 | 3 | 0.65 |
| WB | 316 | 0.10 | 4 | 0.3 | 100 | 3 | 0.65 |
| WB | 317 | 0.05 | 4 | 0.4 | 100 | 3 | 0.65 |
| WB | 318 | 0.15 | 4 | 0.5 | 100 | 3 | 0.65 |
| WB | 319 | 0.05 | 4 | 0.3 | 150 | 3 | 0.65 |
| WB | 320 | 0.10 | 4 | 0.5 | 150 | 3 | 0.65 |
| WB | 321 | 0.15 | 4 | 0.4 | 150 | 3 | 0.65 |
| WB | 322 | 0.05 | 4 | 0.5 | 200 | 3 | 0.65 |
| WB | 323 | 0.10 | 4 | 0.4 | 200 | 3 | 0.65 |
| WB | 324 | 0.15 | 4 | 0.3 | 200 | 3 | 0.65 |
| WB | 325 | 0.10 | 2 | 0.5 | 100 | 4 | 0.35 |
| WB | 326 | 0.15 | 2 | 0.4 | 100 | 4 | 0.35 |
| WB | 327 | 0.05 | 2 | 0.3 | 100 | 4 | 0.35 |
| WB | 328 | 0.10 | 2 | 0.4 | 150 | 4 | 0.35 |
| WB | 329 | 0.05 | 2 | 0.5 | 150 | 4 | 0.35 |
| WB | 330 | 0.15 | 2 | 0.3 | 150 | 4 | 0.35 |
| WB | 331 | 0.15 | 2 | 0.5 | 200 | 4 | 0.35 |
| WB | 332 | 0.05 | 2 | 0.4 | 200 | 4 | 0.35 |
| WB | 333 | 0.10 | 2 | 0.3 | 200 | 4 | 0.35 |
| WB | 334 | 0.10 | 3 | 0.4 | 100 | 4 | 0.35 |
| WB | 335 | 0.15 | 3 | 0.3 | 100 | 4 | 0.35 |
| WB | 336 | 0.05 | 3 | 0.5 | 100 | 4 | 0.35 |
| WB | 337 | 0.10 | 3 | 0.3 | 150 | 4 | 0.35 |
| WB | 338 | 0.15 | 3 | 0.5 | 150 | 4 | 0.35 |
| WB | 339 | 0.05 | 3 | 0.4 | 150 | 4 | 0.35 |
| WB | 340 | 0.15 | 3 | 0.4 | 200 | 4 | 0.35 |
| WB | 341 | 0.10 | 3 | 0.5 | 200 | 4 | 0.35 |
| WB | 342 | 0.05 | 3 | 0.3 | 200 | 4 | 0.35 |
| WB | 343 | 0.10 | 4 | 0.3 | 100 | 4 | 0.35 |
| WB | 344 | 0.05 | 4 | 0.4 | 100 | 4 | 0.35 |
| WB | 345 | 0.15 | 4 | 0.5 | 100 | 4 | 0.35 |
| WB | 346 | 0.05 | 4 | 0.3 | 150 | 4 | 0.35 |
| WB | 347 | 0.10 | 4 | 0.5 | 150 | 4 | 0.35 |
| WB | 348 | 0.15 | 4 | 0.4 | 150 | 4 | 0.35 |
| WB | 349 | 0.05 | 4 | 0.5 | 200 | 4 | 0.35 |
| WB | 350 | 0.10 | 4 | 0.4 | 200 | 4 | 0.35 |
| WB | 351 | 0.15 | 4 | 0.3 | 200 | 4 | 0.35 |
| WB | 352 | 0.10 | 2 | 0.5 | 100 | 4 | 0.5  |
| WB | 353 | 0.15 | 2 | 0.4 | 100 | 4 | 0.5  |

|    |     |      |   |     |     |   |      |
|----|-----|------|---|-----|-----|---|------|
| WB | 354 | 0.05 | 2 | 0.3 | 100 | 4 | 0.5  |
| WB | 355 | 0.10 | 2 | 0.4 | 150 | 4 | 0.5  |
| WB | 356 | 0.05 | 2 | 0.5 | 150 | 4 | 0.5  |
| WB | 357 | 0.15 | 2 | 0.3 | 150 | 4 | 0.5  |
| WB | 358 | 0.15 | 2 | 0.5 | 200 | 4 | 0.5  |
| WB | 359 | 0.05 | 2 | 0.4 | 200 | 4 | 0.5  |
| WB | 360 | 0.10 | 2 | 0.3 | 200 | 4 | 0.5  |
| WB | 361 | 0.10 | 3 | 0.4 | 100 | 4 | 0.5  |
| WB | 362 | 0.15 | 3 | 0.3 | 100 | 4 | 0.5  |
| WB | 363 | 0.05 | 3 | 0.5 | 100 | 4 | 0.5  |
| WB | 364 | 0.10 | 3 | 0.3 | 150 | 4 | 0.5  |
| WB | 365 | 0.15 | 3 | 0.5 | 150 | 4 | 0.5  |
| WB | 366 | 0.05 | 3 | 0.4 | 150 | 4 | 0.5  |
| WB | 367 | 0.15 | 3 | 0.4 | 200 | 4 | 0.5  |
| WB | 368 | 0.10 | 3 | 0.5 | 200 | 4 | 0.5  |
| WB | 369 | 0.05 | 3 | 0.3 | 200 | 4 | 0.5  |
| WB | 370 | 0.10 | 4 | 0.3 | 100 | 4 | 0.5  |
| WB | 371 | 0.05 | 4 | 0.4 | 100 | 4 | 0.5  |
| WB | 372 | 0.15 | 4 | 0.5 | 100 | 4 | 0.5  |
| WB | 373 | 0.05 | 4 | 0.3 | 150 | 4 | 0.5  |
| WB | 374 | 0.10 | 4 | 0.5 | 150 | 4 | 0.5  |
| WB | 375 | 0.15 | 4 | 0.4 | 150 | 4 | 0.5  |
| WB | 376 | 0.05 | 4 | 0.5 | 200 | 4 | 0.5  |
| WB | 377 | 0.10 | 4 | 0.4 | 200 | 4 | 0.5  |
| WB | 378 | 0.15 | 4 | 0.3 | 200 | 4 | 0.5  |
| WB | 379 | 0.10 | 2 | 0.5 | 100 | 4 | 0.65 |
| WB | 380 | 0.15 | 2 | 0.4 | 100 | 4 | 0.65 |
| WB | 381 | 0.05 | 2 | 0.3 | 100 | 4 | 0.65 |
| WB | 382 | 0.10 | 2 | 0.4 | 150 | 4 | 0.65 |
| WB | 383 | 0.05 | 2 | 0.5 | 150 | 4 | 0.65 |
| WB | 384 | 0.15 | 2 | 0.3 | 150 | 4 | 0.65 |
| WB | 385 | 0.15 | 2 | 0.5 | 200 | 4 | 0.65 |
| WB | 386 | 0.05 | 2 | 0.4 | 200 | 4 | 0.65 |
| WB | 387 | 0.10 | 2 | 0.3 | 200 | 4 | 0.65 |
| WB | 388 | 0.10 | 3 | 0.4 | 100 | 4 | 0.65 |
| WB | 389 | 0.15 | 3 | 0.3 | 100 | 4 | 0.65 |
| WB | 390 | 0.05 | 3 | 0.5 | 100 | 4 | 0.65 |
| WB | 391 | 0.10 | 3 | 0.3 | 150 | 4 | 0.65 |
| WB | 392 | 0.15 | 3 | 0.5 | 150 | 4 | 0.65 |
| WB | 393 | 0.05 | 3 | 0.4 | 150 | 4 | 0.65 |
| WB | 394 | 0.15 | 3 | 0.4 | 200 | 4 | 0.65 |
| WB | 395 | 0.10 | 3 | 0.5 | 200 | 4 | 0.65 |
| WB | 396 | 0.05 | 3 | 0.3 | 200 | 4 | 0.65 |
| WB | 397 | 0.10 | 4 | 0.3 | 100 | 4 | 0.65 |
| WB | 398 | 0.05 | 4 | 0.4 | 100 | 4 | 0.65 |
| WB | 399 | 0.15 | 4 | 0.5 | 100 | 4 | 0.65 |
| WB | 400 | 0.05 | 4 | 0.3 | 150 | 4 | 0.65 |
| WB | 401 | 0.10 | 4 | 0.5 | 150 | 4 | 0.65 |
| WB | 402 | 0.15 | 4 | 0.4 | 150 | 4 | 0.65 |
| WB | 403 | 0.05 | 4 | 0.5 | 200 | 4 | 0.65 |

|    |     |      |   |     |     |    |      |
|----|-----|------|---|-----|-----|----|------|
| WB | 404 | 0.10 | 4 | 0.4 | 200 | 4  | 0.65 |
| WB | 405 | 0.15 | 4 | 0.3 | 200 | 4  | 0.65 |
| WB | 406 | 0.10 | 2 | 0.5 | 100 | 10 | 0.35 |
| WB | 407 | 0.15 | 2 | 0.4 | 100 | 10 | 0.35 |
| WB | 408 | 0.05 | 2 | 0.3 | 100 | 10 | 0.35 |
| WB | 409 | 0.10 | 2 | 0.4 | 150 | 10 | 0.35 |
| WB | 410 | 0.05 | 2 | 0.5 | 150 | 10 | 0.35 |
| WB | 411 | 0.15 | 2 | 0.3 | 150 | 10 | 0.35 |
| WB | 412 | 0.15 | 2 | 0.5 | 200 | 10 | 0.35 |
| WB | 413 | 0.05 | 2 | 0.4 | 200 | 10 | 0.35 |
| WB | 414 | 0.10 | 2 | 0.3 | 200 | 10 | 0.35 |
| WB | 415 | 0.10 | 3 | 0.4 | 100 | 10 | 0.35 |
| WB | 416 | 0.15 | 3 | 0.3 | 100 | 10 | 0.35 |
| WB | 417 | 0.05 | 3 | 0.5 | 100 | 10 | 0.35 |
| WB | 418 | 0.10 | 3 | 0.3 | 150 | 10 | 0.35 |
| WB | 419 | 0.15 | 3 | 0.5 | 150 | 10 | 0.35 |
| WB | 420 | 0.05 | 3 | 0.4 | 150 | 10 | 0.35 |
| WB | 421 | 0.15 | 3 | 0.4 | 200 | 10 | 0.35 |
| WB | 422 | 0.10 | 3 | 0.5 | 200 | 10 | 0.35 |
| WB | 423 | 0.05 | 3 | 0.3 | 200 | 10 | 0.35 |
| WB | 424 | 0.10 | 4 | 0.3 | 100 | 10 | 0.35 |
| WB | 425 | 0.05 | 4 | 0.4 | 100 | 10 | 0.35 |
| WB | 426 | 0.15 | 4 | 0.5 | 100 | 10 | 0.35 |
| WB | 427 | 0.05 | 4 | 0.3 | 150 | 10 | 0.35 |
| WB | 428 | 0.10 | 4 | 0.5 | 150 | 10 | 0.35 |
| WB | 429 | 0.15 | 4 | 0.4 | 150 | 10 | 0.35 |
| WB | 430 | 0.05 | 4 | 0.5 | 200 | 10 | 0.35 |
| WB | 431 | 0.10 | 4 | 0.4 | 200 | 10 | 0.35 |
| WB | 432 | 0.15 | 4 | 0.3 | 200 | 10 | 0.35 |
| WB | 433 | 0.10 | 2 | 0.5 | 100 | 10 | 0.5  |
| WB | 434 | 0.15 | 2 | 0.4 | 100 | 10 | 0.5  |
| WB | 435 | 0.05 | 2 | 0.3 | 100 | 10 | 0.5  |
| WB | 436 | 0.10 | 2 | 0.4 | 150 | 10 | 0.5  |
| WB | 437 | 0.05 | 2 | 0.5 | 150 | 10 | 0.5  |
| WB | 438 | 0.15 | 2 | 0.3 | 150 | 10 | 0.5  |
| WB | 439 | 0.15 | 2 | 0.5 | 200 | 10 | 0.5  |
| WB | 440 | 0.05 | 2 | 0.4 | 200 | 10 | 0.5  |
| WB | 441 | 0.10 | 2 | 0.3 | 200 | 10 | 0.5  |
| WB | 442 | 0.10 | 3 | 0.4 | 100 | 10 | 0.5  |
| WB | 443 | 0.15 | 3 | 0.3 | 100 | 10 | 0.5  |
| WB | 444 | 0.05 | 3 | 0.5 | 100 | 10 | 0.5  |
| WB | 445 | 0.10 | 3 | 0.3 | 150 | 10 | 0.5  |
| WB | 446 | 0.15 | 3 | 0.5 | 150 | 10 | 0.5  |
| WB | 447 | 0.05 | 3 | 0.4 | 150 | 10 | 0.5  |
| WB | 448 | 0.15 | 3 | 0.4 | 200 | 10 | 0.5  |
| WB | 449 | 0.10 | 3 | 0.5 | 200 | 10 | 0.5  |
| WB | 450 | 0.05 | 3 | 0.3 | 200 | 10 | 0.5  |
| WB | 451 | 0.10 | 4 | 0.3 | 100 | 10 | 0.5  |
| WB | 452 | 0.05 | 4 | 0.4 | 100 | 10 | 0.5  |
| WB | 453 | 0.15 | 4 | 0.5 | 100 | 10 | 0.5  |

|    |     |      |   |     |     |    |      |
|----|-----|------|---|-----|-----|----|------|
| WB | 454 | 0.05 | 4 | 0.3 | 150 | 10 | 0.5  |
| WB | 455 | 0.10 | 4 | 0.5 | 150 | 10 | 0.5  |
| WB | 456 | 0.15 | 4 | 0.4 | 150 | 10 | 0.5  |
| WB | 457 | 0.05 | 4 | 0.5 | 200 | 10 | 0.5  |
| WB | 458 | 0.10 | 4 | 0.4 | 200 | 10 | 0.5  |
| WB | 459 | 0.15 | 4 | 0.3 | 200 | 10 | 0.5  |
| WB | 460 | 0.10 | 2 | 0.5 | 100 | 10 | 0.65 |
| WB | 461 | 0.15 | 2 | 0.4 | 100 | 10 | 0.65 |
| WB | 462 | 0.05 | 2 | 0.3 | 100 | 10 | 0.65 |
| WB | 463 | 0.10 | 2 | 0.4 | 150 | 10 | 0.65 |
| WB | 464 | 0.05 | 2 | 0.5 | 150 | 10 | 0.65 |
| WB | 465 | 0.15 | 2 | 0.3 | 150 | 10 | 0.65 |
| WB | 466 | 0.15 | 2 | 0.5 | 200 | 10 | 0.65 |
| WB | 467 | 0.05 | 2 | 0.4 | 200 | 10 | 0.65 |
| WB | 468 | 0.10 | 2 | 0.3 | 200 | 10 | 0.65 |
| WB | 469 | 0.10 | 3 | 0.4 | 100 | 10 | 0.65 |
| WB | 470 | 0.15 | 3 | 0.3 | 100 | 10 | 0.65 |
| WB | 471 | 0.05 | 3 | 0.5 | 100 | 10 | 0.65 |
| WB | 472 | 0.10 | 3 | 0.3 | 150 | 10 | 0.65 |
| WB | 473 | 0.15 | 3 | 0.5 | 150 | 10 | 0.65 |
| WB | 474 | 0.05 | 3 | 0.4 | 150 | 10 | 0.65 |
| WB | 475 | 0.15 | 3 | 0.4 | 200 | 10 | 0.65 |
| WB | 476 | 0.10 | 3 | 0.5 | 200 | 10 | 0.65 |
| WB | 477 | 0.05 | 3 | 0.3 | 200 | 10 | 0.65 |
| WB | 478 | 0.10 | 4 | 0.3 | 100 | 10 | 0.65 |
| WB | 479 | 0.05 | 4 | 0.4 | 100 | 10 | 0.65 |
| WB | 480 | 0.15 | 4 | 0.5 | 100 | 10 | 0.65 |
| WB | 481 | 0.05 | 4 | 0.3 | 150 | 10 | 0.65 |
| WB | 482 | 0.10 | 4 | 0.5 | 150 | 10 | 0.65 |
| WB | 483 | 0.15 | 4 | 0.4 | 150 | 10 | 0.65 |
| WB | 484 | 0.05 | 4 | 0.5 | 200 | 10 | 0.65 |
| WB | 485 | 0.10 | 4 | 0.4 | 200 | 10 | 0.65 |
| WB | 486 | 0.15 | 4 | 0.3 | 200 | 10 | 0.65 |

|    |    |      |   |     |     |   |      |
|----|----|------|---|-----|-----|---|------|
| WC | 1  | 0.10 | 2 | 0.5 | 100 | 0 | 0.35 |
| WC | 2  | 0.15 | 2 | 0.4 | 100 | 0 | 0.35 |
| WC | 3  | 0.05 | 2 | 0.3 | 100 | 0 | 0.35 |
| WC | 4  | 0.10 | 2 | 0.4 | 150 | 0 | 0.35 |
| WC | 5  | 0.05 | 2 | 0.5 | 150 | 0 | 0.35 |
| WC | 6  | 0.15 | 2 | 0.3 | 150 | 0 | 0.35 |
| WC | 7  | 0.15 | 2 | 0.5 | 200 | 0 | 0.35 |
| WC | 8  | 0.05 | 2 | 0.4 | 200 | 0 | 0.35 |
| WC | 9  | 0.10 | 2 | 0.3 | 200 | 0 | 0.35 |
| WC | 10 | 0.10 | 3 | 0.4 | 100 | 0 | 0.35 |
| WC | 11 | 0.15 | 3 | 0.3 | 100 | 0 | 0.35 |
| WC | 12 | 0.05 | 3 | 0.5 | 100 | 0 | 0.35 |
| WC | 13 | 0.10 | 3 | 0.3 | 150 | 0 | 0.35 |
| WC | 14 | 0.15 | 3 | 0.5 | 150 | 0 | 0.35 |
| WC | 15 | 0.05 | 3 | 0.4 | 150 | 0 | 0.35 |
| WC | 16 | 0.15 | 3 | 0.4 | 200 | 0 | 0.35 |

|    |    |      |   |     |     |   |      |
|----|----|------|---|-----|-----|---|------|
| WC | 17 | 0.10 | 3 | 0.5 | 200 | 0 | 0.35 |
| WC | 18 | 0.05 | 3 | 0.3 | 200 | 0 | 0.35 |
| WC | 19 | 0.10 | 4 | 0.3 | 100 | 0 | 0.35 |
| WC | 20 | 0.05 | 4 | 0.4 | 100 | 0 | 0.35 |
| WC | 21 | 0.15 | 4 | 0.5 | 100 | 0 | 0.35 |
| WC | 22 | 0.05 | 4 | 0.3 | 150 | 0 | 0.35 |
| WC | 23 | 0.10 | 4 | 0.5 | 150 | 0 | 0.35 |
| WC | 24 | 0.15 | 4 | 0.4 | 150 | 0 | 0.35 |
| WC | 25 | 0.05 | 4 | 0.5 | 200 | 0 | 0.35 |
| WC | 26 | 0.10 | 4 | 0.4 | 200 | 0 | 0.35 |
| WC | 27 | 0.15 | 4 | 0.3 | 200 | 0 | 0.35 |
| WC | 28 | 0.10 | 2 | 0.5 | 100 | 0 | 0.5  |
| WC | 29 | 0.15 | 2 | 0.4 | 100 | 0 | 0.5  |
| WC | 30 | 0.05 | 2 | 0.3 | 100 | 0 | 0.5  |
| WC | 31 | 0.10 | 2 | 0.4 | 150 | 0 | 0.5  |
| WC | 32 | 0.05 | 2 | 0.5 | 150 | 0 | 0.5  |
| WC | 33 | 0.15 | 2 | 0.3 | 150 | 0 | 0.5  |
| WC | 34 | 0.15 | 2 | 0.5 | 200 | 0 | 0.5  |
| WC | 35 | 0.05 | 2 | 0.4 | 200 | 0 | 0.5  |
| WC | 36 | 0.10 | 2 | 0.3 | 200 | 0 | 0.5  |
| WC | 37 | 0.10 | 3 | 0.4 | 100 | 0 | 0.5  |
| WC | 38 | 0.15 | 3 | 0.3 | 100 | 0 | 0.5  |
| WC | 39 | 0.05 | 3 | 0.5 | 100 | 0 | 0.5  |
| WC | 40 | 0.10 | 3 | 0.3 | 150 | 0 | 0.5  |
| WC | 41 | 0.15 | 3 | 0.5 | 150 | 0 | 0.5  |
| WC | 42 | 0.05 | 3 | 0.4 | 150 | 0 | 0.5  |
| WC | 43 | 0.15 | 3 | 0.4 | 200 | 0 | 0.5  |
| WC | 44 | 0.10 | 3 | 0.5 | 200 | 0 | 0.5  |
| WC | 45 | 0.05 | 3 | 0.3 | 200 | 0 | 0.5  |
| WC | 46 | 0.10 | 4 | 0.3 | 100 | 0 | 0.5  |
| WC | 47 | 0.05 | 4 | 0.4 | 100 | 0 | 0.5  |
| WC | 48 | 0.15 | 4 | 0.5 | 100 | 0 | 0.5  |
| WC | 49 | 0.05 | 4 | 0.3 | 150 | 0 | 0.5  |
| WC | 50 | 0.10 | 4 | 0.5 | 150 | 0 | 0.5  |
| WC | 51 | 0.15 | 4 | 0.4 | 150 | 0 | 0.5  |
| WC | 52 | 0.05 | 4 | 0.5 | 200 | 0 | 0.5  |
| WC | 53 | 0.10 | 4 | 0.4 | 200 | 0 | 0.5  |
| WC | 54 | 0.15 | 4 | 0.3 | 200 | 0 | 0.5  |
| WC | 55 | 0.10 | 2 | 0.5 | 100 | 0 | 0.65 |
| WC | 56 | 0.15 | 2 | 0.4 | 100 | 0 | 0.65 |
| WC | 57 | 0.05 | 2 | 0.3 | 100 | 0 | 0.65 |
| WC | 58 | 0.10 | 2 | 0.4 | 150 | 0 | 0.65 |
| WC | 59 | 0.05 | 2 | 0.5 | 150 | 0 | 0.65 |
| WC | 60 | 0.15 | 2 | 0.3 | 150 | 0 | 0.65 |
| WC | 61 | 0.15 | 2 | 0.5 | 200 | 0 | 0.65 |
| WC | 62 | 0.05 | 2 | 0.4 | 200 | 0 | 0.65 |
| WC | 63 | 0.10 | 2 | 0.3 | 200 | 0 | 0.65 |
| WC | 64 | 0.10 | 3 | 0.4 | 100 | 0 | 0.65 |
| WC | 65 | 0.15 | 3 | 0.3 | 100 | 0 | 0.65 |
| WC | 66 | 0.05 | 3 | 0.5 | 100 | 0 | 0.65 |

|    |     |      |   |     |     |   |      |
|----|-----|------|---|-----|-----|---|------|
| WC | 67  | 0.10 | 3 | 0.3 | 150 | 0 | 0.65 |
| WC | 68  | 0.15 | 3 | 0.5 | 150 | 0 | 0.65 |
| WC | 69  | 0.05 | 3 | 0.4 | 150 | 0 | 0.65 |
| WC | 70  | 0.15 | 3 | 0.4 | 200 | 0 | 0.65 |
| WC | 71  | 0.10 | 3 | 0.5 | 200 | 0 | 0.65 |
| WC | 72  | 0.05 | 3 | 0.3 | 200 | 0 | 0.65 |
| WC | 73  | 0.10 | 4 | 0.3 | 100 | 0 | 0.65 |
| WC | 74  | 0.05 | 4 | 0.4 | 100 | 0 | 0.65 |
| WC | 75  | 0.15 | 4 | 0.5 | 100 | 0 | 0.65 |
| WC | 76  | 0.05 | 4 | 0.3 | 150 | 0 | 0.65 |
| WC | 77  | 0.10 | 4 | 0.5 | 150 | 0 | 0.65 |
| WC | 78  | 0.15 | 4 | 0.4 | 150 | 0 | 0.65 |
| WC | 79  | 0.05 | 4 | 0.5 | 200 | 0 | 0.65 |
| WC | 80  | 0.10 | 4 | 0.4 | 200 | 0 | 0.65 |
| WC | 81  | 0.15 | 4 | 0.3 | 200 | 0 | 0.65 |
| WC | 82  | 0.10 | 2 | 0.5 | 100 | 1 | 0.35 |
| WC | 83  | 0.15 | 2 | 0.4 | 100 | 1 | 0.35 |
| WC | 84  | 0.05 | 2 | 0.3 | 100 | 1 | 0.35 |
| WC | 85  | 0.10 | 2 | 0.4 | 150 | 1 | 0.35 |
| WC | 86  | 0.05 | 2 | 0.5 | 150 | 1 | 0.35 |
| WC | 87  | 0.15 | 2 | 0.3 | 150 | 1 | 0.35 |
| WC | 88  | 0.15 | 2 | 0.5 | 200 | 1 | 0.35 |
| WC | 89  | 0.05 | 2 | 0.4 | 200 | 1 | 0.35 |
| WC | 90  | 0.10 | 2 | 0.3 | 200 | 1 | 0.35 |
| WC | 91  | 0.10 | 3 | 0.4 | 100 | 1 | 0.35 |
| WC | 92  | 0.15 | 3 | 0.3 | 100 | 1 | 0.35 |
| WC | 93  | 0.05 | 3 | 0.5 | 100 | 1 | 0.35 |
| WC | 94  | 0.10 | 3 | 0.3 | 150 | 1 | 0.35 |
| WC | 95  | 0.15 | 3 | 0.5 | 150 | 1 | 0.35 |
| WC | 96  | 0.05 | 3 | 0.4 | 150 | 1 | 0.35 |
| WC | 97  | 0.15 | 3 | 0.4 | 200 | 1 | 0.35 |
| WC | 98  | 0.10 | 3 | 0.5 | 200 | 1 | 0.35 |
| WC | 99  | 0.05 | 3 | 0.3 | 200 | 1 | 0.35 |
| WC | 100 | 0.10 | 4 | 0.3 | 100 | 1 | 0.35 |
| WC | 101 | 0.05 | 4 | 0.4 | 100 | 1 | 0.35 |
| WC | 102 | 0.15 | 4 | 0.5 | 100 | 1 | 0.35 |
| WC | 103 | 0.05 | 4 | 0.3 | 150 | 1 | 0.35 |
| WC | 104 | 0.10 | 4 | 0.5 | 150 | 1 | 0.35 |
| WC | 105 | 0.15 | 4 | 0.4 | 150 | 1 | 0.35 |
| WC | 106 | 0.05 | 4 | 0.5 | 200 | 1 | 0.35 |
| WC | 107 | 0.10 | 4 | 0.4 | 200 | 1 | 0.35 |
| WC | 108 | 0.15 | 4 | 0.3 | 200 | 1 | 0.35 |
| WC | 109 | 0.10 | 2 | 0.5 | 100 | 1 | 0.5  |
| WC | 110 | 0.15 | 2 | 0.4 | 100 | 1 | 0.5  |
| WC | 111 | 0.05 | 2 | 0.3 | 100 | 1 | 0.5  |
| WC | 112 | 0.10 | 2 | 0.4 | 150 | 1 | 0.5  |
| WC | 113 | 0.05 | 2 | 0.5 | 150 | 1 | 0.5  |
| WC | 114 | 0.15 | 2 | 0.3 | 150 | 1 | 0.5  |
| WC | 115 | 0.15 | 2 | 0.5 | 200 | 1 | 0.5  |
| WC | 116 | 0.05 | 2 | 0.4 | 200 | 1 | 0.5  |

|    |     |      |   |     |     |   |      |
|----|-----|------|---|-----|-----|---|------|
| WC | 117 | 0.10 | 2 | 0.3 | 200 | 1 | 0.5  |
| WC | 118 | 0.10 | 3 | 0.4 | 100 | 1 | 0.5  |
| WC | 119 | 0.15 | 3 | 0.3 | 100 | 1 | 0.5  |
| WC | 120 | 0.05 | 3 | 0.5 | 100 | 1 | 0.5  |
| WC | 121 | 0.10 | 3 | 0.3 | 150 | 1 | 0.5  |
| WC | 122 | 0.15 | 3 | 0.5 | 150 | 1 | 0.5  |
| WC | 123 | 0.05 | 3 | 0.4 | 150 | 1 | 0.5  |
| WC | 124 | 0.15 | 3 | 0.4 | 200 | 1 | 0.5  |
| WC | 125 | 0.10 | 3 | 0.5 | 200 | 1 | 0.5  |
| WC | 126 | 0.05 | 3 | 0.3 | 200 | 1 | 0.5  |
| WC | 127 | 0.10 | 4 | 0.3 | 100 | 1 | 0.5  |
| WC | 128 | 0.05 | 4 | 0.4 | 100 | 1 | 0.5  |
| WC | 129 | 0.15 | 4 | 0.5 | 100 | 1 | 0.5  |
| WC | 130 | 0.05 | 4 | 0.3 | 150 | 1 | 0.5  |
| WC | 131 | 0.10 | 4 | 0.5 | 150 | 1 | 0.5  |
| WC | 132 | 0.15 | 4 | 0.4 | 150 | 1 | 0.5  |
| WC | 133 | 0.05 | 4 | 0.5 | 200 | 1 | 0.5  |
| WC | 134 | 0.10 | 4 | 0.4 | 200 | 1 | 0.5  |
| WC | 135 | 0.15 | 4 | 0.3 | 200 | 1 | 0.5  |
| WC | 136 | 0.10 | 2 | 0.5 | 100 | 1 | 0.65 |
| WC | 137 | 0.15 | 2 | 0.4 | 100 | 1 | 0.65 |
| WC | 138 | 0.05 | 2 | 0.3 | 100 | 1 | 0.65 |
| WC | 139 | 0.10 | 2 | 0.4 | 150 | 1 | 0.65 |
| WC | 140 | 0.05 | 2 | 0.5 | 150 | 1 | 0.65 |
| WC | 141 | 0.15 | 2 | 0.3 | 150 | 1 | 0.65 |
| WC | 142 | 0.15 | 2 | 0.5 | 200 | 1 | 0.65 |
| WC | 143 | 0.05 | 2 | 0.4 | 200 | 1 | 0.65 |
| WC | 144 | 0.10 | 2 | 0.3 | 200 | 1 | 0.65 |
| WC | 145 | 0.10 | 3 | 0.4 | 100 | 1 | 0.65 |
| WC | 146 | 0.15 | 3 | 0.3 | 100 | 1 | 0.65 |
| WC | 147 | 0.05 | 3 | 0.5 | 100 | 1 | 0.65 |
| WC | 148 | 0.10 | 3 | 0.3 | 150 | 1 | 0.65 |
| WC | 149 | 0.15 | 3 | 0.5 | 150 | 1 | 0.65 |
| WC | 150 | 0.05 | 3 | 0.4 | 150 | 1 | 0.65 |
| WC | 151 | 0.15 | 3 | 0.4 | 200 | 1 | 0.65 |
| WC | 152 | 0.10 | 3 | 0.5 | 200 | 1 | 0.65 |
| WC | 153 | 0.05 | 3 | 0.3 | 200 | 1 | 0.65 |
| WC | 154 | 0.10 | 4 | 0.3 | 100 | 1 | 0.65 |
| WC | 155 | 0.05 | 4 | 0.4 | 100 | 1 | 0.65 |
| WC | 156 | 0.15 | 4 | 0.5 | 100 | 1 | 0.65 |
| WC | 157 | 0.05 | 4 | 0.3 | 150 | 1 | 0.65 |
| WC | 158 | 0.10 | 4 | 0.5 | 150 | 1 | 0.65 |
| WC | 159 | 0.15 | 4 | 0.4 | 150 | 1 | 0.65 |
| WC | 160 | 0.05 | 4 | 0.5 | 200 | 1 | 0.65 |
| WC | 161 | 0.10 | 4 | 0.4 | 200 | 1 | 0.65 |
| WC | 162 | 0.15 | 4 | 0.3 | 200 | 1 | 0.65 |
| WC | 163 | 0.10 | 2 | 0.5 | 100 | 2 | 0.35 |
| WC | 164 | 0.15 | 2 | 0.4 | 100 | 2 | 0.35 |
| WC | 165 | 0.05 | 2 | 0.3 | 100 | 2 | 0.35 |
| WC | 166 | 0.10 | 2 | 0.4 | 150 | 2 | 0.35 |

|    |     |      |   |     |     |   |      |
|----|-----|------|---|-----|-----|---|------|
| WC | 167 | 0.05 | 2 | 0.5 | 150 | 2 | 0.35 |
| WC | 168 | 0.15 | 2 | 0.3 | 150 | 2 | 0.35 |
| WC | 169 | 0.15 | 2 | 0.5 | 200 | 2 | 0.35 |
| WC | 170 | 0.05 | 2 | 0.4 | 200 | 2 | 0.35 |
| WC | 171 | 0.10 | 2 | 0.3 | 200 | 2 | 0.35 |
| WC | 172 | 0.10 | 3 | 0.4 | 100 | 2 | 0.35 |
| WC | 173 | 0.15 | 3 | 0.3 | 100 | 2 | 0.35 |
| WC | 174 | 0.05 | 3 | 0.5 | 100 | 2 | 0.35 |
| WC | 175 | 0.10 | 3 | 0.3 | 150 | 2 | 0.35 |
| WC | 176 | 0.15 | 3 | 0.5 | 150 | 2 | 0.35 |
| WC | 177 | 0.05 | 3 | 0.4 | 150 | 2 | 0.35 |
| WC | 178 | 0.15 | 3 | 0.4 | 200 | 2 | 0.35 |
| WC | 179 | 0.10 | 3 | 0.5 | 200 | 2 | 0.35 |
| WC | 180 | 0.05 | 3 | 0.3 | 200 | 2 | 0.35 |
| WC | 181 | 0.10 | 4 | 0.3 | 100 | 2 | 0.35 |
| WC | 182 | 0.05 | 4 | 0.4 | 100 | 2 | 0.35 |
| WC | 183 | 0.15 | 4 | 0.5 | 100 | 2 | 0.35 |
| WC | 184 | 0.05 | 4 | 0.3 | 150 | 2 | 0.35 |
| WC | 185 | 0.10 | 4 | 0.5 | 150 | 2 | 0.35 |
| WC | 186 | 0.15 | 4 | 0.4 | 150 | 2 | 0.35 |
| WC | 187 | 0.05 | 4 | 0.5 | 200 | 2 | 0.35 |
| WC | 188 | 0.10 | 4 | 0.4 | 200 | 2 | 0.35 |
| WC | 189 | 0.15 | 4 | 0.3 | 200 | 2 | 0.35 |
| WC | 190 | 0.10 | 2 | 0.5 | 100 | 2 | 0.5  |
| WC | 191 | 0.15 | 2 | 0.4 | 100 | 2 | 0.5  |
| WC | 192 | 0.05 | 2 | 0.3 | 100 | 2 | 0.5  |
| WC | 193 | 0.10 | 2 | 0.4 | 150 | 2 | 0.5  |
| WC | 194 | 0.05 | 2 | 0.5 | 150 | 2 | 0.5  |
| WC | 195 | 0.15 | 2 | 0.3 | 150 | 2 | 0.5  |
| WC | 196 | 0.15 | 2 | 0.5 | 200 | 2 | 0.5  |
| WC | 197 | 0.05 | 2 | 0.4 | 200 | 2 | 0.5  |
| WC | 198 | 0.10 | 2 | 0.3 | 200 | 2 | 0.5  |
| WC | 199 | 0.10 | 3 | 0.4 | 100 | 2 | 0.5  |
| WC | 200 | 0.15 | 3 | 0.3 | 100 | 2 | 0.5  |
| WC | 201 | 0.05 | 3 | 0.5 | 100 | 2 | 0.5  |
| WC | 202 | 0.10 | 3 | 0.3 | 150 | 2 | 0.5  |
| WC | 203 | 0.15 | 3 | 0.5 | 150 | 2 | 0.5  |
| WC | 204 | 0.05 | 3 | 0.4 | 150 | 2 | 0.5  |
| WC | 205 | 0.15 | 3 | 0.4 | 200 | 2 | 0.5  |
| WC | 206 | 0.10 | 3 | 0.5 | 200 | 2 | 0.5  |
| WC | 207 | 0.05 | 3 | 0.3 | 200 | 2 | 0.5  |
| WC | 208 | 0.10 | 4 | 0.3 | 100 | 2 | 0.5  |
| WC | 209 | 0.05 | 4 | 0.4 | 100 | 2 | 0.5  |
| WC | 210 | 0.15 | 4 | 0.5 | 100 | 2 | 0.5  |
| WC | 211 | 0.05 | 4 | 0.3 | 150 | 2 | 0.5  |
| WC | 212 | 0.10 | 4 | 0.5 | 150 | 2 | 0.5  |
| WC | 213 | 0.15 | 4 | 0.4 | 150 | 2 | 0.5  |
| WC | 214 | 0.05 | 4 | 0.5 | 200 | 2 | 0.5  |
| WC | 215 | 0.10 | 4 | 0.4 | 200 | 2 | 0.5  |
| WC | 216 | 0.15 | 4 | 0.3 | 200 | 2 | 0.5  |



|    |     |      |   |     |     |   |      |
|----|-----|------|---|-----|-----|---|------|
| WC | 217 | 0.10 | 2 | 0.5 | 100 | 2 | 0.65 |
| WC | 218 | 0.15 | 2 | 0.4 | 100 | 2 | 0.65 |
| WC | 219 | 0.05 | 2 | 0.3 | 100 | 2 | 0.65 |
| WC | 220 | 0.10 | 2 | 0.4 | 150 | 2 | 0.65 |
| WC | 221 | 0.05 | 2 | 0.5 | 150 | 2 | 0.65 |
| WC | 222 | 0.15 | 2 | 0.3 | 150 | 2 | 0.65 |
| WC | 223 | 0.15 | 2 | 0.5 | 200 | 2 | 0.65 |
| WC | 224 | 0.05 | 2 | 0.4 | 200 | 2 | 0.65 |
| WC | 225 | 0.10 | 2 | 0.3 | 200 | 2 | 0.65 |
| WC | 226 | 0.10 | 3 | 0.4 | 100 | 2 | 0.65 |
| WC | 227 | 0.15 | 3 | 0.3 | 100 | 2 | 0.65 |
| WC | 228 | 0.05 | 3 | 0.5 | 100 | 2 | 0.65 |
| WC | 229 | 0.10 | 3 | 0.3 | 150 | 2 | 0.65 |
| WC | 230 | 0.15 | 3 | 0.5 | 150 | 2 | 0.65 |
| WC | 231 | 0.05 | 3 | 0.4 | 150 | 2 | 0.65 |
| WC | 232 | 0.15 | 3 | 0.4 | 200 | 2 | 0.65 |
| WC | 233 | 0.10 | 3 | 0.5 | 200 | 2 | 0.65 |
| WC | 234 | 0.05 | 3 | 0.3 | 200 | 2 | 0.65 |
| WC | 235 | 0.10 | 4 | 0.3 | 100 | 2 | 0.65 |
| WC | 236 | 0.05 | 4 | 0.4 | 100 | 2 | 0.65 |
| WC | 237 | 0.15 | 4 | 0.5 | 100 | 2 | 0.65 |
| WC | 238 | 0.05 | 4 | 0.3 | 150 | 2 | 0.65 |
| WC | 239 | 0.10 | 4 | 0.5 | 150 | 2 | 0.65 |
| WC | 240 | 0.15 | 4 | 0.4 | 150 | 2 | 0.65 |
| WC | 241 | 0.05 | 4 | 0.5 | 200 | 2 | 0.65 |
| WC | 242 | 0.10 | 4 | 0.4 | 200 | 2 | 0.65 |
| WC | 243 | 0.15 | 4 | 0.3 | 200 | 2 | 0.65 |
| WC | 244 | 0.10 | 2 | 0.5 | 100 | 3 | 0.35 |
| WC | 245 | 0.15 | 2 | 0.4 | 100 | 3 | 0.35 |
| WC | 246 | 0.05 | 2 | 0.3 | 100 | 3 | 0.35 |
| WC | 247 | 0.10 | 2 | 0.4 | 150 | 3 | 0.35 |
| WC | 248 | 0.05 | 2 | 0.5 | 150 | 3 | 0.35 |
| WC | 249 | 0.15 | 2 | 0.3 | 150 | 3 | 0.35 |
| WC | 250 | 0.15 | 2 | 0.5 | 200 | 3 | 0.35 |
| WC | 251 | 0.05 | 2 | 0.4 | 200 | 3 | 0.35 |
| WC | 252 | 0.10 | 2 | 0.3 | 200 | 3 | 0.35 |
| WC | 253 | 0.10 | 3 | 0.4 | 100 | 3 | 0.35 |
| WC | 254 | 0.15 | 3 | 0.3 | 100 | 3 | 0.35 |
| WC | 255 | 0.05 | 3 | 0.5 | 100 | 3 | 0.35 |
| WC | 256 | 0.10 | 3 | 0.3 | 150 | 3 | 0.35 |
| WC | 257 | 0.15 | 3 | 0.5 | 150 | 3 | 0.35 |
| WC | 258 | 0.05 | 3 | 0.4 | 150 | 3 | 0.35 |
| WC | 259 | 0.15 | 3 | 0.4 | 200 | 3 | 0.35 |
| WC | 260 | 0.10 | 3 | 0.5 | 200 | 3 | 0.35 |
| WC | 261 | 0.05 | 3 | 0.3 | 200 | 3 | 0.35 |
| WC | 262 | 0.10 | 4 | 0.3 | 100 | 3 | 0.35 |
| WC | 263 | 0.05 | 4 | 0.4 | 100 | 3 | 0.35 |
| WC | 264 | 0.15 | 4 | 0.5 | 100 | 3 | 0.35 |
| WC | 265 | 0.05 | 4 | 0.3 | 150 | 3 | 0.35 |
| WC | 266 | 0.10 | 4 | 0.5 | 150 | 3 | 0.35 |

|    |     |      |   |     |     |   |      |
|----|-----|------|---|-----|-----|---|------|
| WC | 267 | 0.15 | 4 | 0.4 | 150 | 3 | 0.35 |
| WC | 268 | 0.05 | 4 | 0.5 | 200 | 3 | 0.35 |
| WC | 269 | 0.10 | 4 | 0.4 | 200 | 3 | 0.35 |
| WC | 270 | 0.15 | 4 | 0.3 | 200 | 3 | 0.35 |
| WC | 271 | 0.10 | 2 | 0.5 | 100 | 3 | 0.5  |
| WC | 272 | 0.15 | 2 | 0.4 | 100 | 3 | 0.5  |
| WC | 273 | 0.05 | 2 | 0.3 | 100 | 3 | 0.5  |
| WC | 274 | 0.10 | 2 | 0.4 | 150 | 3 | 0.5  |
| WC | 275 | 0.05 | 2 | 0.5 | 150 | 3 | 0.5  |
| WC | 276 | 0.15 | 2 | 0.3 | 150 | 3 | 0.5  |
| WC | 277 | 0.15 | 2 | 0.5 | 200 | 3 | 0.5  |
| WC | 278 | 0.05 | 2 | 0.4 | 200 | 3 | 0.5  |
| WC | 279 | 0.10 | 2 | 0.3 | 200 | 3 | 0.5  |
| WC | 280 | 0.10 | 3 | 0.4 | 100 | 3 | 0.5  |
| WC | 281 | 0.15 | 3 | 0.3 | 100 | 3 | 0.5  |
| WC | 282 | 0.05 | 3 | 0.5 | 100 | 3 | 0.5  |
| WC | 283 | 0.10 | 3 | 0.3 | 150 | 3 | 0.5  |
| WC | 284 | 0.15 | 3 | 0.5 | 150 | 3 | 0.5  |
| WC | 285 | 0.05 | 3 | 0.4 | 150 | 3 | 0.5  |
| WC | 286 | 0.15 | 3 | 0.4 | 200 | 3 | 0.5  |
| WC | 287 | 0.10 | 3 | 0.5 | 200 | 3 | 0.5  |
| WC | 288 | 0.05 | 3 | 0.3 | 200 | 3 | 0.5  |
| WC | 289 | 0.10 | 4 | 0.3 | 100 | 3 | 0.5  |
| WC | 290 | 0.05 | 4 | 0.4 | 100 | 3 | 0.5  |
| WC | 291 | 0.15 | 4 | 0.5 | 100 | 3 | 0.5  |
| WC | 292 | 0.05 | 4 | 0.3 | 150 | 3 | 0.5  |
| WC | 293 | 0.10 | 4 | 0.5 | 150 | 3 | 0.5  |
| WC | 294 | 0.15 | 4 | 0.4 | 150 | 3 | 0.5  |
| WC | 295 | 0.05 | 4 | 0.5 | 200 | 3 | 0.5  |
| WC | 296 | 0.10 | 4 | 0.4 | 200 | 3 | 0.5  |
| WC | 297 | 0.15 | 4 | 0.3 | 200 | 3 | 0.5  |
| WC | 298 | 0.10 | 2 | 0.5 | 100 | 3 | 0.65 |
| WC | 299 | 0.15 | 2 | 0.4 | 100 | 3 | 0.65 |
| WC | 300 | 0.05 | 2 | 0.3 | 100 | 3 | 0.65 |
| WC | 301 | 0.10 | 2 | 0.4 | 150 | 3 | 0.65 |
| WC | 302 | 0.05 | 2 | 0.5 | 150 | 3 | 0.65 |
| WC | 303 | 0.15 | 2 | 0.3 | 150 | 3 | 0.65 |
| WC | 304 | 0.15 | 2 | 0.5 | 200 | 3 | 0.65 |
| WC | 305 | 0.05 | 2 | 0.4 | 200 | 3 | 0.65 |
| WC | 306 | 0.10 | 2 | 0.3 | 200 | 3 | 0.65 |
| WC | 307 | 0.10 | 3 | 0.4 | 100 | 3 | 0.65 |
| WC | 308 | 0.15 | 3 | 0.3 | 100 | 3 | 0.65 |
| WC | 309 | 0.05 | 3 | 0.5 | 100 | 3 | 0.65 |
| WC | 310 | 0.10 | 3 | 0.3 | 150 | 3 | 0.65 |
| WC | 311 | 0.15 | 3 | 0.5 | 150 | 3 | 0.65 |
| WC | 312 | 0.05 | 3 | 0.4 | 150 | 3 | 0.65 |
| WC | 313 | 0.15 | 3 | 0.4 | 200 | 3 | 0.65 |
| WC | 314 | 0.10 | 3 | 0.5 | 200 | 3 | 0.65 |
| WC | 315 | 0.05 | 3 | 0.3 | 200 | 3 | 0.65 |
| WC | 316 | 0.10 | 4 | 0.3 | 100 | 3 | 0.65 |

|    |     |      |   |     |     |   |      |
|----|-----|------|---|-----|-----|---|------|
| WC | 317 | 0.05 | 4 | 0.4 | 100 | 3 | 0.65 |
| WC | 318 | 0.15 | 4 | 0.5 | 100 | 3 | 0.65 |
| WC | 319 | 0.05 | 4 | 0.3 | 150 | 3 | 0.65 |
| WC | 320 | 0.10 | 4 | 0.5 | 150 | 3 | 0.65 |
| WC | 321 | 0.15 | 4 | 0.4 | 150 | 3 | 0.65 |
| WC | 322 | 0.05 | 4 | 0.5 | 200 | 3 | 0.65 |
| WC | 323 | 0.10 | 4 | 0.4 | 200 | 3 | 0.65 |
| WC | 324 | 0.15 | 4 | 0.3 | 200 | 3 | 0.65 |
| WC | 325 | 0.10 | 2 | 0.5 | 100 | 4 | 0.35 |
| WC | 326 | 0.15 | 2 | 0.4 | 100 | 4 | 0.35 |
| WC | 327 | 0.05 | 2 | 0.3 | 100 | 4 | 0.35 |
| WC | 328 | 0.10 | 2 | 0.4 | 150 | 4 | 0.35 |
| WC | 329 | 0.05 | 2 | 0.5 | 150 | 4 | 0.35 |
| WC | 330 | 0.15 | 2 | 0.3 | 150 | 4 | 0.35 |
| WC | 331 | 0.15 | 2 | 0.5 | 200 | 4 | 0.35 |
| WC | 332 | 0.05 | 2 | 0.4 | 200 | 4 | 0.35 |
| WC | 333 | 0.10 | 2 | 0.3 | 200 | 4 | 0.35 |
| WC | 334 | 0.10 | 3 | 0.4 | 100 | 4 | 0.35 |
| WC | 335 | 0.15 | 3 | 0.3 | 100 | 4 | 0.35 |
| WC | 336 | 0.05 | 3 | 0.5 | 100 | 4 | 0.35 |
| WC | 337 | 0.10 | 3 | 0.3 | 150 | 4 | 0.35 |
| WC | 338 | 0.15 | 3 | 0.5 | 150 | 4 | 0.35 |
| WC | 339 | 0.05 | 3 | 0.4 | 150 | 4 | 0.35 |
| WC | 340 | 0.15 | 3 | 0.4 | 200 | 4 | 0.35 |
| WC | 341 | 0.10 | 3 | 0.5 | 200 | 4 | 0.35 |
| WC | 342 | 0.05 | 3 | 0.3 | 200 | 4 | 0.35 |
| WC | 343 | 0.10 | 4 | 0.3 | 100 | 4 | 0.35 |
| WC | 344 | 0.05 | 4 | 0.4 | 100 | 4 | 0.35 |
| WC | 345 | 0.15 | 4 | 0.5 | 100 | 4 | 0.35 |
| WC | 346 | 0.05 | 4 | 0.3 | 150 | 4 | 0.35 |
| WC | 347 | 0.10 | 4 | 0.5 | 150 | 4 | 0.35 |
| WC | 348 | 0.15 | 4 | 0.4 | 150 | 4 | 0.35 |
| WC | 349 | 0.05 | 4 | 0.5 | 200 | 4 | 0.35 |
| WC | 350 | 0.10 | 4 | 0.4 | 200 | 4 | 0.35 |
| WC | 351 | 0.15 | 4 | 0.3 | 200 | 4 | 0.35 |
| WC | 352 | 0.10 | 2 | 0.5 | 100 | 4 | 0.5  |
| WC | 353 | 0.15 | 2 | 0.4 | 100 | 4 | 0.5  |
| WC | 354 | 0.05 | 2 | 0.3 | 100 | 4 | 0.5  |
| WC | 355 | 0.10 | 2 | 0.4 | 150 | 4 | 0.5  |
| WC | 356 | 0.05 | 2 | 0.5 | 150 | 4 | 0.5  |
| WC | 357 | 0.15 | 2 | 0.3 | 150 | 4 | 0.5  |
| WC | 358 | 0.15 | 2 | 0.5 | 200 | 4 | 0.5  |
| WC | 359 | 0.05 | 2 | 0.4 | 200 | 4 | 0.5  |
| WC | 360 | 0.10 | 2 | 0.3 | 200 | 4 | 0.5  |
| WC | 361 | 0.10 | 3 | 0.4 | 100 | 4 | 0.5  |
| WC | 362 | 0.15 | 3 | 0.3 | 100 | 4 | 0.5  |
| WC | 363 | 0.05 | 3 | 0.5 | 100 | 4 | 0.5  |
| WC | 364 | 0.10 | 3 | 0.3 | 150 | 4 | 0.5  |
| WC | 365 | 0.15 | 3 | 0.5 | 150 | 4 | 0.5  |
| WC | 366 | 0.05 | 3 | 0.4 | 150 | 4 | 0.5  |

|    |     |      |   |     |     |    |      |
|----|-----|------|---|-----|-----|----|------|
| WC | 367 | 0.15 | 3 | 0.4 | 200 | 4  | 0.5  |
| WC | 368 | 0.10 | 3 | 0.5 | 200 | 4  | 0.5  |
| WC | 369 | 0.05 | 3 | 0.3 | 200 | 4  | 0.5  |
| WC | 370 | 0.10 | 4 | 0.3 | 100 | 4  | 0.5  |
| WC | 371 | 0.05 | 4 | 0.4 | 100 | 4  | 0.5  |
| WC | 372 | 0.15 | 4 | 0.5 | 100 | 4  | 0.5  |
| WC | 373 | 0.05 | 4 | 0.3 | 150 | 4  | 0.5  |
| WC | 374 | 0.10 | 4 | 0.5 | 150 | 4  | 0.5  |
| WC | 375 | 0.15 | 4 | 0.4 | 150 | 4  | 0.5  |
| WC | 376 | 0.05 | 4 | 0.5 | 200 | 4  | 0.5  |
| WC | 377 | 0.10 | 4 | 0.4 | 200 | 4  | 0.5  |
| WC | 378 | 0.15 | 4 | 0.3 | 200 | 4  | 0.5  |
| WC | 379 | 0.10 | 2 | 0.5 | 100 | 4  | 0.65 |
| WC | 380 | 0.15 | 2 | 0.4 | 100 | 4  | 0.65 |
| WC | 381 | 0.05 | 2 | 0.3 | 100 | 4  | 0.65 |
| WC | 382 | 0.10 | 2 | 0.4 | 150 | 4  | 0.65 |
| WC | 383 | 0.05 | 2 | 0.5 | 150 | 4  | 0.65 |
| WC | 384 | 0.15 | 2 | 0.3 | 150 | 4  | 0.65 |
| WC | 385 | 0.15 | 2 | 0.5 | 200 | 4  | 0.65 |
| WC | 386 | 0.05 | 2 | 0.4 | 200 | 4  | 0.65 |
| WC | 387 | 0.10 | 2 | 0.3 | 200 | 4  | 0.65 |
| WC | 388 | 0.10 | 3 | 0.4 | 100 | 4  | 0.65 |
| WC | 389 | 0.15 | 3 | 0.3 | 100 | 4  | 0.65 |
| WC | 390 | 0.05 | 3 | 0.5 | 100 | 4  | 0.65 |
| WC | 391 | 0.10 | 3 | 0.3 | 150 | 4  | 0.65 |
| WC | 392 | 0.15 | 3 | 0.5 | 150 | 4  | 0.65 |
| WC | 393 | 0.05 | 3 | 0.4 | 150 | 4  | 0.65 |
| WC | 394 | 0.15 | 3 | 0.4 | 200 | 4  | 0.65 |
| WC | 395 | 0.10 | 3 | 0.5 | 200 | 4  | 0.65 |
| WC | 396 | 0.05 | 3 | 0.3 | 200 | 4  | 0.65 |
| WC | 397 | 0.10 | 4 | 0.3 | 100 | 4  | 0.65 |
| WC | 398 | 0.05 | 4 | 0.4 | 100 | 4  | 0.65 |
| WC | 399 | 0.15 | 4 | 0.5 | 100 | 4  | 0.65 |
| WC | 400 | 0.05 | 4 | 0.3 | 150 | 4  | 0.65 |
| WC | 401 | 0.10 | 4 | 0.5 | 150 | 4  | 0.65 |
| WC | 402 | 0.15 | 4 | 0.4 | 150 | 4  | 0.65 |
| WC | 403 | 0.05 | 4 | 0.5 | 200 | 4  | 0.65 |
| WC | 404 | 0.10 | 4 | 0.4 | 200 | 4  | 0.65 |
| WC | 405 | 0.15 | 4 | 0.3 | 200 | 4  | 0.65 |
| WC | 406 | 0.10 | 2 | 0.5 | 100 | 10 | 0.35 |
| WC | 407 | 0.15 | 2 | 0.4 | 100 | 10 | 0.35 |
| WC | 408 | 0.05 | 2 | 0.3 | 100 | 10 | 0.35 |
| WC | 409 | 0.10 | 2 | 0.4 | 150 | 10 | 0.35 |
| WC | 410 | 0.05 | 2 | 0.5 | 150 | 10 | 0.35 |
| WC | 411 | 0.15 | 2 | 0.3 | 150 | 10 | 0.35 |
| WC | 412 | 0.15 | 2 | 0.5 | 200 | 10 | 0.35 |
| WC | 413 | 0.05 | 2 | 0.4 | 200 | 10 | 0.35 |
| WC | 414 | 0.10 | 2 | 0.3 | 200 | 10 | 0.35 |
| WC | 415 | 0.10 | 3 | 0.4 | 100 | 10 | 0.35 |
| WC | 416 | 0.15 | 3 | 0.3 | 100 | 10 | 0.35 |

|    |     |      |   |     |     |    |      |
|----|-----|------|---|-----|-----|----|------|
| WC | 417 | 0.05 | 3 | 0.5 | 100 | 10 | 0.35 |
| WC | 418 | 0.10 | 3 | 0.3 | 150 | 10 | 0.35 |
| WC | 419 | 0.15 | 3 | 0.5 | 150 | 10 | 0.35 |
| WC | 420 | 0.05 | 3 | 0.4 | 150 | 10 | 0.35 |
| WC | 421 | 0.15 | 3 | 0.4 | 200 | 10 | 0.35 |
| WC | 422 | 0.10 | 3 | 0.5 | 200 | 10 | 0.35 |
| WC | 423 | 0.05 | 3 | 0.3 | 200 | 10 | 0.35 |
| WC | 424 | 0.10 | 4 | 0.3 | 100 | 10 | 0.35 |
| WC | 425 | 0.05 | 4 | 0.4 | 100 | 10 | 0.35 |
| WC | 426 | 0.15 | 4 | 0.5 | 100 | 10 | 0.35 |
| WC | 427 | 0.05 | 4 | 0.3 | 150 | 10 | 0.35 |
| WC | 428 | 0.10 | 4 | 0.5 | 150 | 10 | 0.35 |
| WC | 429 | 0.15 | 4 | 0.4 | 150 | 10 | 0.35 |
| WC | 430 | 0.05 | 4 | 0.5 | 200 | 10 | 0.35 |
| WC | 431 | 0.10 | 4 | 0.4 | 200 | 10 | 0.35 |
| WC | 432 | 0.15 | 4 | 0.3 | 200 | 10 | 0.35 |
| WC | 433 | 0.10 | 2 | 0.5 | 100 | 10 | 0.5  |
| WC | 434 | 0.15 | 2 | 0.4 | 100 | 10 | 0.5  |
| WC | 435 | 0.05 | 2 | 0.3 | 100 | 10 | 0.5  |
| WC | 436 | 0.10 | 2 | 0.4 | 150 | 10 | 0.5  |
| WC | 437 | 0.05 | 2 | 0.5 | 150 | 10 | 0.5  |
| WC | 438 | 0.15 | 2 | 0.3 | 150 | 10 | 0.5  |
| WC | 439 | 0.15 | 2 | 0.5 | 200 | 10 | 0.5  |
| WC | 440 | 0.05 | 2 | 0.4 | 200 | 10 | 0.5  |
| WC | 441 | 0.10 | 2 | 0.3 | 200 | 10 | 0.5  |
| WC | 442 | 0.10 | 3 | 0.4 | 100 | 10 | 0.5  |
| WC | 443 | 0.15 | 3 | 0.3 | 100 | 10 | 0.5  |
| WC | 444 | 0.05 | 3 | 0.5 | 100 | 10 | 0.5  |
| WC | 445 | 0.10 | 3 | 0.3 | 150 | 10 | 0.5  |
| WC | 446 | 0.15 | 3 | 0.5 | 150 | 10 | 0.5  |
| WC | 447 | 0.05 | 3 | 0.4 | 150 | 10 | 0.5  |
| WC | 448 | 0.15 | 3 | 0.4 | 200 | 10 | 0.5  |
| WC | 449 | 0.10 | 3 | 0.5 | 200 | 10 | 0.5  |
| WC | 450 | 0.05 | 3 | 0.3 | 200 | 10 | 0.5  |
| WC | 451 | 0.10 | 4 | 0.3 | 100 | 10 | 0.5  |
| WC | 452 | 0.05 | 4 | 0.4 | 100 | 10 | 0.5  |
| WC | 453 | 0.15 | 4 | 0.5 | 100 | 10 | 0.5  |
| WC | 454 | 0.05 | 4 | 0.3 | 150 | 10 | 0.5  |
| WC | 455 | 0.10 | 4 | 0.5 | 150 | 10 | 0.5  |
| WC | 456 | 0.15 | 4 | 0.4 | 150 | 10 | 0.5  |
| WC | 457 | 0.05 | 4 | 0.5 | 200 | 10 | 0.5  |
| WC | 458 | 0.10 | 4 | 0.4 | 200 | 10 | 0.5  |
| WC | 459 | 0.15 | 4 | 0.3 | 200 | 10 | 0.5  |
| WC | 460 | 0.10 | 2 | 0.5 | 100 | 10 | 0.65 |
| WC | 461 | 0.15 | 2 | 0.4 | 100 | 10 | 0.65 |
| WC | 462 | 0.05 | 2 | 0.3 | 100 | 10 | 0.65 |
| WC | 463 | 0.10 | 2 | 0.4 | 150 | 10 | 0.65 |
| WC | 464 | 0.05 | 2 | 0.5 | 150 | 10 | 0.65 |
| WC | 465 | 0.15 | 2 | 0.3 | 150 | 10 | 0.65 |
| WC | 466 | 0.15 | 2 | 0.5 | 200 | 10 | 0.65 |

|    |     |      |   |     |     |    |      |
|----|-----|------|---|-----|-----|----|------|
| WC | 467 | 0.05 | 2 | 0.4 | 200 | 10 | 0.65 |
| WC | 468 | 0.10 | 2 | 0.3 | 200 | 10 | 0.65 |
| WC | 469 | 0.10 | 3 | 0.4 | 100 | 10 | 0.65 |
| WC | 470 | 0.15 | 3 | 0.3 | 100 | 10 | 0.65 |
| WC | 471 | 0.05 | 3 | 0.5 | 100 | 10 | 0.65 |
| WC | 472 | 0.10 | 3 | 0.3 | 150 | 10 | 0.65 |
| WC | 473 | 0.15 | 3 | 0.5 | 150 | 10 | 0.65 |
| WC | 474 | 0.05 | 3 | 0.4 | 150 | 10 | 0.65 |
| WC | 475 | 0.15 | 3 | 0.4 | 200 | 10 | 0.65 |
| WC | 476 | 0.10 | 3 | 0.5 | 200 | 10 | 0.65 |
| WC | 477 | 0.05 | 3 | 0.3 | 200 | 10 | 0.65 |
| WC | 478 | 0.10 | 4 | 0.3 | 100 | 10 | 0.65 |
| WC | 479 | 0.05 | 4 | 0.4 | 100 | 10 | 0.65 |
| WC | 480 | 0.15 | 4 | 0.5 | 100 | 10 | 0.65 |
| WC | 481 | 0.05 | 4 | 0.3 | 150 | 10 | 0.65 |
| WC | 482 | 0.10 | 4 | 0.5 | 150 | 10 | 0.65 |
| WC | 483 | 0.15 | 4 | 0.4 | 150 | 10 | 0.65 |
| WC | 484 | 0.05 | 4 | 0.5 | 200 | 10 | 0.65 |
| WC | 485 | 0.10 | 4 | 0.4 | 200 | 10 | 0.65 |
| WC | 486 | 0.15 | 4 | 0.3 | 200 | 10 | 0.65 |
